# Supplementary material
Source: PubMed Central journal article supplement (PMC9618539)
Supplement: 12325_2022_2321_MOESM1_ESM.pdf [file 12325_2022_2321_MOESM1_ESM.pdf]

**Title:** Systematic literature review of the use of productivity losses/gains in cost-effectiveness analyses of immune-mediated disorders

**Authors:** Akira Yuasa<sup>1</sup>, Naohiro Yonemoto<sup>1</sup>, Kazumasa Kamei<sup>1</sup>, Toshiaki Murofushi<sup>2</sup>, Michael LoPresti<sup>2</sup>, Ankush Taneja<sup>3</sup>, Jake Horgan<sup>4</sup>, Shunya Ikeda<sup>5</sup>

**Affiliations:**

1: Pfizer Japan Inc., Shibuya-ku, Tokyo 151-8589, Japan

2: INTAGE Healthcare Inc., Chiyoda-ku, Tokyo 101-0062, Japan

3: Lumanity, Gurugram, 122018, India

4: Lumanity, Sheffield, S1 2GQ, United Kingdom

5: Department of Public Health, School of Medicine, International University of Health and Welfare, Narita, 286-8686, Japan

**Corresponding Author:**

Name: Shunya Ikeda

Affiliation: Department of Public Health, School of Medicine, International University of Health and Welfare

Address: 4-3, Kozunomori, Narita, 286-8686, Japan

E-mail: shunya@iuhw.ac.jp

## Appendix 1: Searches

**Table S1: Embase.com searches 26 Oct 2020**

| S. No. | Query                                                                                                                                                                                                                                                                                                                                                                                                                                                                                                                                                                                                                                                                                                                                                                | Results   |
|--------|----------------------------------------------------------------------------------------------------------------------------------------------------------------------------------------------------------------------------------------------------------------------------------------------------------------------------------------------------------------------------------------------------------------------------------------------------------------------------------------------------------------------------------------------------------------------------------------------------------------------------------------------------------------------------------------------------------------------------------------------------------------------|-----------|
| 1      | 'crohn disease'/exp OR 'inflammatory bowel disease'/mj                                                                                                                                                                                                                                                                                                                                                                                                                                                                                                                                                                                                                                                                                                               | 103,699   |
| 2      | 'cleron disease':ab,ti,kw OR crohn*:ab,ti,kw OR ((regional* NEAR/2 enter*):ab,ti,kw)                                                                                                                                                                                                                                                                                                                                                                                                                                                                                                                                                                                                                                                                                 | 84,566    |
| 3      | 'systemic lupus erythematosus'/exp                                                                                                                                                                                                                                                                                                                                                                                                                                                                                                                                                                                                                                                                                                                                   | 94,637    |
| 4      | dermatovisceritism:ab,ti,kw OR erythematodes*:ab,ti,kw OR lupovisceritis:ab,ti,kw OR 'osler libman*':ab,ti,kw OR sle:ab,ti,kw OR 's.l.e.':ab,ti,kw OR 's.l.e.':ab,ti,kw                                                                                                                                                                                                                                                                                                                                                                                                                                                                                                                                                                                              | 55,312    |
| 5      | (lupus NEAR/2 (dissesemina* OR erythema*)):ab,ti,kw                                                                                                                                                                                                                                                                                                                                                                                                                                                                                                                                                                                                                                                                                                                  | 84,307    |
| 6      | 'rheumatoid arthritis'/exp OR 'ankylosing spondylitis'/exp OR 'psoriasis'/exp OR 'chronic urticaria'/exp OR 'psoriatic arthritis'/exp OR 'ulcerative colitis'/exp OR 'fibromyalgia'/exp OR 'juvenile rheumatoid arthritis'/exp                                                                                                                                                                                                                                                                                                                                                                                                                                                                                                                                       | 411,188   |
| 7      | 'ulcerative colitis':ab,ti,kw OR 'ulcerative colitis'/exp                                                                                                                                                                                                                                                                                                                                                                                                                                                                                                                                                                                                                                                                                                            | 85,824    |
| 8      | ((ulcer* OR mucos*) NEAR/2 (colit* OR colon* OR colorec*)):ab,ti,kw                                                                                                                                                                                                                                                                                                                                                                                                                                                                                                                                                                                                                                                                                                  | 83,515    |
| 9      | (inflamm* NEAR/2 bowel*):ab,ti,kw                                                                                                                                                                                                                                                                                                                                                                                                                                                                                                                                                                                                                                                                                                                                    | 84,754    |
| 10     | proctocolitis:ab,ti,kw OR proctosigmoiditis:ab,ti,kw OR rectocolitis:ab,ti,kw OR rectosigmoiditis:ab,ti,kw OR proctitis:ab,ti,kw                                                                                                                                                                                                                                                                                                                                                                                                                                                                                                                                                                                                                                     | 6,214     |
| 11     | 'rheumatoid arthritis':ab,ti,kw OR 'arthrosis deformans':ab,ti,kw OR beauvais:ab,ti,kw OR rheumarthritis:ab,ti,kw OR (((rheum* OR poly* OR inflam*) NEAR/2 (arthr* OR deforma* OR articular))):ab,ti,kw                                                                                                                                                                                                                                                                                                                                                                                                                                                                                                                                                              | 176,525   |
| 12     | 'ankylosing spondylitis':ab,ti,kw OR ((anky* NEAR/2 (spondyl* OR spine)):ab,ti,kw) OR bechterew:ab,ti,kw OR bekhtere:ab,ti,kw OR 'vertebral ankylosis':ab,ti,kw                                                                                                                                                                                                                                                                                                                                                                                                                                                                                                                                                                                                      | 25,420    |
| 13     | psoria*:ab,ti,kw OR 'willan lepra':ab,ti,kw OR 'psoriatic arthritis':ab,ti,kw OR 'alibert bazin*':ab,ti,kw OR 'arthritis psoriatica':ab,ti,kw OR 'chronic urticaria':ab,ti,kw OR 'chronic idiopathic urticaria':ab,ti,kw OR 'chronic spontaneous urticaria':ab,ti,kw OR ((chronic NEAR/3 urticaria*):ab,ti,kw)                                                                                                                                                                                                                                                                                                                                                                                                                                                       | 84,778    |
| 15     | fibromyalgia:ab,ti,kw OR 'fibrositic nodule':ab,ti,kw OR fibrositis:ab,ti,kw                                                                                                                                                                                                                                                                                                                                                                                                                                                                                                                                                                                                                                                                                         | 17,241    |
| 16     | 'juvenile idiopathic arthritis':ab,ti,kw OR ((juvenile* NEAR/2 (arthr* OR rheum* OR polyar*)):ab,ti,kw)                                                                                                                                                                                                                                                                                                                                                                                                                                                                                                                                                                                                                                                              | 17,584    |
| 17     | 'pharmacoeconomics'/exp OR 'cost effectiveness analysis'/exp OR 'economic evaluation'/exp OR 'cost utility analysis'/exp OR 'decision tree'/exp OR markov*:ab,ti,kw OR ((decision NEXT/2 tree*):ab,ti,kw) OR ((decision NEXT/2 analy*):ab,ti,kw) OR (((incremental OR qaly OR 'quality adjusted life years') NEAR/3 cost*):ab,ti,kw) OR ((cost* NEAR/3 (effect* OR utility* OR benefit OR conseq* OR minimi* OR increment* OR qaly* OR ly* OR 'quality adjusted life year*' OR 'life year*')):ab,ti,kw) OR icer:ab,ti,kw OR qaly:ab,ti,kw OR 'quality adjusted life year*':ab,ti,kw OR (((markov* OR simulat* OR decisio* OR analy* OR economic* OR transitio* OR state*) NEAR/3 model*):ab,ti,kw) OR 'economic model'/exp OR 'markov chain'/exp OR 'simulation'/exp | 1,116,749 |
| 18     | #1 OR #2 OR #3 OR #4 OR #5 OR #6 OR #7 OR #8 OR #9 OR #10 OR #11 OR #12 OR #13 OR #15 OR #16                                                                                                                                                                                                                                                                                                                                                                                                                                                                                                                                                                                                                                                                         | 672,581   |
| 19     | 'tumor necrosis factor inhibitor'/exp OR 'monoclonal antibody'/exp OR 'immunotherapy'/exp OR 'biological therapy'/exp                                                                                                                                                                                                                                                                                                                                                                                                                                                                                                                                                                                                                                                | 2,176,079 |
| 20     | #17 AND #18 AND #19                                                                                                                                                                                                                                                                                                                                                                                                                                                                                                                                                                                                                                                                                                                                                  | 7,422     |

| S. No. | Query                                                                                                                                                                                                                                                                                                                                                                                                                                                                                                                                                                                                                                                                                                                                                                                                                                                                                                                                                                                                                                                                                                                                                                                                                                                                                                                                                                                                                                                                                                                                                                                             | Results    |
|--------|---------------------------------------------------------------------------------------------------------------------------------------------------------------------------------------------------------------------------------------------------------------------------------------------------------------------------------------------------------------------------------------------------------------------------------------------------------------------------------------------------------------------------------------------------------------------------------------------------------------------------------------------------------------------------------------------------------------------------------------------------------------------------------------------------------------------------------------------------------------------------------------------------------------------------------------------------------------------------------------------------------------------------------------------------------------------------------------------------------------------------------------------------------------------------------------------------------------------------------------------------------------------------------------------------------------------------------------------------------------------------------------------------------------------------------------------------------------------------------------------------------------------------------------------------------------------------------------------------|------------|
| 21     | 'case study'/exp OR 'case report'/exp OR 'abstract report'/exp OR 'editorial'/exp OR 'letter'/exp OR 'note'/exp OR 'case study':ab,ti OR 'case report':ab,ti OR 'abstract report':ab,ti OR editorial:ab,ti OR letter:ab,ti OR comment:ab,ti OR note:ab,ti                                                                                                                                                                                                                                                                                                                                                                                                                                                                                                                                                                                                                                                                                                                                                                                                                                                                                                                                                                                                                                                                                                                                                                                                                                                                                                                                         | 4,291,558  |
| 22     | 'animal'/exp NOT ('animal'/exp AND 'human'/exp)                                                                                                                                                                                                                                                                                                                                                                                                                                                                                                                                                                                                                                                                                                                                                                                                                                                                                                                                                                                                                                                                                                                                                                                                                                                                                                                                                                                                                                                                                                                                                   | 4,804,215  |
| 23     | review:it OR 'review literature as topic'/exp OR 'literature review':ti NOT ('meta-analysis':it OR 'meta-analysis as topic'/mj OR 'systematic review':ti OR 'systematic literature review':ti OR 'meta-analysis':ab,ti OR 'meta analysis':ab,ti)                                                                                                                                                                                                                                                                                                                                                                                                                                                                                                                                                                                                                                                                                                                                                                                                                                                                                                                                                                                                                                                                                                                                                                                                                                                                                                                                                  | 2,755,707  |
| 24     | #21 OR #22 OR #23                                                                                                                                                                                                                                                                                                                                                                                                                                                                                                                                                                                                                                                                                                                                                                                                                                                                                                                                                                                                                                                                                                                                                                                                                                                                                                                                                                                                                                                                                                                                                                                 | 12,967,613 |
| 25     | #20 NOT #24 AND [2010-2020]/py                                                                                                                                                                                                                                                                                                                                                                                                                                                                                                                                                                                                                                                                                                                                                                                                                                                                                                                                                                                                                                                                                                                                                                                                                                                                                                                                                                                                                                                                                                                                                                    | 4,041      |
| 26     | #20 NOT #24 AND [2010-2020]/py AND ([conference abstract]/lim OR [conference paper]/lim OR [conference review]/lim)                                                                                                                                                                                                                                                                                                                                                                                                                                                                                                                                                                                                                                                                                                                                                                                                                                                                                                                                                                                                                                                                                                                                                                                                                                                                                                                                                                                                                                                                               | 2,058      |
| 27     | #20 NOT #24 AND [2010-2020]/py AND ([conference abstract]/lim OR [conference paper]/lim OR [conference review]/lim) AND [2018-2020]/py                                                                                                                                                                                                                                                                                                                                                                                                                                                                                                                                                                                                                                                                                                                                                                                                                                                                                                                                                                                                                                                                                                                                                                                                                                                                                                                                                                                                                                                            | 488        |
| 28     | #25 NOT #26                                                                                                                                                                                                                                                                                                                                                                                                                                                                                                                                                                                                                                                                                                                                                                                                                                                                                                                                                                                                                                                                                                                                                                                                                                                                                                                                                                                                                                                                                                                                                                                       | 1,983      |
| 29     | #27 OR #28                                                                                                                                                                                                                                                                                                                                                                                                                                                                                                                                                                                                                                                                                                                                                                                                                                                                                                                                                                                                                                                                                                                                                                                                                                                                                                                                                                                                                                                                                                                                                                                        | 2,507      |
| 30     | 'cost control'/exp OR 'health care cost'/exp OR 'drug cost'/exp OR 'hospital cost'/exp OR 'cost of illness'/exp OR 'health care utilization'/exp OR 'resource management'/exp OR 'resource allocation'/exp OR ((healthcare NEXT/1 cost*):ab,ti,kw) OR ((unit NEXT/1 cost*):ab,ti,kw) OR ((cost* NEAR/3 (treat* OR therap*)):ab,ti,kw) OR (((total OR direct OR indirect OR medical OR drug OR administration OR laborat* OR diagnos* OR illness) NEAR/2 (cost OR costs)):ab,ti,kw) OR 'economic burden':ab,ti,kw OR 'hospitalization cost'/exp OR 'fee'/exp OR 'budget'/exp OR price:ab,ti,kw OR pricing:ab,ti,kw OR fee:ab,ti,kw OR fees:ab,ti,kw OR budget:ab,ti,kw OR budgets:ab,ti,kw OR (('pharmacoeconomics'/exp OR 'cost effectiveness analysis'/exp OR 'economic evaluation'/exp OR 'cost utility analysis'/exp OR 'decision tree'/exp OR markov*:ab,ti,kw OR ((decision NEXT/2 tree*):ab,ti,kw) OR ((decision NEXT/2 analy*):ab,ti,kw) OR (((incremental OR qaly OR 'quality adjusted life years') NEAR/3 cost*):ab,ti,kw) OR ((cost* NEAR/3 (effect* OR utility* OR benefit OR conseq* OR minimi* OR increment* OR qaly* OR ly* OR 'quality adjusted life year*' OR 'life year*')):ab,ti,kw) OR icer:ab,ti,kw OR qaly:ab,ti,kw OR 'quality adjusted life year*':ab,ti,kw OR (((markov* OR simulat* OR decisio* OR analy* OR economic* OR transitio* OR state*) NEAR/3 model*):ab,ti,kw) OR 'economic model'/exp OR 'markov chain'/exp OR 'simulation'/exp) AND ('tumor necrosis factor inhibitor'/exp OR 'monoclonal antibody'/exp OR 'immunotherapy'/exp OR 'biological therapy'/exp)) | 671,161    |
| 31     | psoria*:ab,ti,kw OR 'willan lepra':ab,ti,kw OR 'psoriatic arthritis':ab,ti,kw OR 'alibert bazin*':ab,ti,kw OR 'arthritis psoriatica':ab,ti,kw OR 'chronic urticaria':ab,ti,kw OR 'chronic idiopathic urticaria':ab,ti,kw OR 'chronic spontaneous urticaria':ab,ti,kw OR ((chronic NEAR/3 urticaria*):ab,ti,kw) OR sulzberger:ab,ti,kw OR neurodermatitis:ab,ti,kw OR 'besniers*':ab,ti,kw OR (((atopic OR endogenous) NEAR/3 (dermat* OR eczema*)):ab,ti,kw) OR eczema*:ab,ti,kw OR dermatitis:ab,ti,kw                                                                                                                                                                                                                                                                                                                                                                                                                                                                                                                                                                                                                                                                                                                                                                                                                                                                                                                                                                                                                                                                                           | 184,988    |
| 32     | 'atopic dermatitis'/exp OR 'psoriasis'/exp OR 'psoriatic arthritis'/exp OR 'chronic urticaria'/exp OR 'neurodermatitis'/exp OR 'eczema'/exp                                                                                                                                                                                                                                                                                                                                                                                                                                                                                                                                                                                                                                                                                                                                                                                                                                                                                                                                                                                                                                                                                                                                                                                                                                                                                                                                                                                                                                                       | 160,968    |
| 33     | #31 OR #32                                                                                                                                                                                                                                                                                                                                                                                                                                                                                                                                                                                                                                                                                                                                                                                                                                                                                                                                                                                                                                                                                                                                                                                                                                                                                                                                                                                                                                                                                                                                                                                        | 528,176    |
| 34     | #30 AND #33                                                                                                                                                                                                                                                                                                                                                                                                                                                                                                                                                                                                                                                                                                                                                                                                                                                                                                                                                                                                                                                                                                                                                                                                                                                                                                                                                                                                                                                                                                                                                                                       | 16,959     |
| 35     | #34 NOT #24 AND [2010-2020]/py                                                                                                                                                                                                                                                                                                                                                                                                                                                                                                                                                                                                                                                                                                                                                                                                                                                                                                                                                                                                                                                                                                                                                                                                                                                                                                                                                                                                                                                                                                                                                                    | 8,259      |
| 36     | #34 NOT #24 AND [2010-2020]/py AND ([conference abstract]/lim OR [conference paper]/lim OR [conference review]/lim)                                                                                                                                                                                                                                                                                                                                                                                                                                                                                                                                                                                                                                                                                                                                                                                                                                                                                                                                                                                                                                                                                                                                                                                                                                                                                                                                                                                                                                                                               | 4,625      |

| S. No. | Query                                                                                                                                  | Results |
|--------|----------------------------------------------------------------------------------------------------------------------------------------|---------|
| 37     | #34 NOT #24 AND [2010-2020]/py AND ([conference abstract]/lim OR [conference paper]/lim OR [conference review]/lim) AND [2018-2020]/py | 1,226   |
| 38     | #35 NOT #36                                                                                                                            | 3,628   |
| 39     | #37 OR #38                                                                                                                             | 4,859   |
| 40     | #29 OR #39                                                                                                                             | 3,797   |

**Table S2: MEDLINE In process 26 Oct 2020**

| S. No. | Query                                                                                                                                                                                                                                                                                                                                                                                     | Results |
|--------|-------------------------------------------------------------------------------------------------------------------------------------------------------------------------------------------------------------------------------------------------------------------------------------------------------------------------------------------------------------------------------------------|---------|
| 1      | "crohn disease"[MeSH Terms]                                                                                                                                                                                                                                                                                                                                                               | 39,146  |
| 2      | "inflammatory bowel diseases"[MeSH Major Topic]                                                                                                                                                                                                                                                                                                                                           | 69,825  |
| 3      | "cleron disease"[Title/Abstract] OR crohn*[Title/Abstract] OR ((regional*[Title/Abstract] AND enter*[Title/Abstract])                                                                                                                                                                                                                                                                     | 54,085  |
| 4      | "lupus erythematosus, systemic"[MeSH Terms]                                                                                                                                                                                                                                                                                                                                               | 59,910  |
| 5      | dermatovisceritism[Title/Abstract] OR erythematodes*[Title/Abstract] OR lupovisceritis[Title/Abstract] OR "osler libman"[Title/Abstract] OR sle[Title/Abstract] OR "s.l.e"[Title/Abstract] OR "s.i.e."[Title/Abstract]                                                                                                                                                                    | 35,071  |
| 6      | (lupus[Title/Abstract] AND (dissemina*[Title/Abstract] OR erythema*[Title/Abstract]))                                                                                                                                                                                                                                                                                                     | 62,139  |
| 7      | "arthritis, rheumatoid"[MeSH Terms]                                                                                                                                                                                                                                                                                                                                                       | 113,669 |
| 8      | "spondylitis, ankylosing"[MeSH Terms]                                                                                                                                                                                                                                                                                                                                                     | 14,782  |
| 9      | "psoriasis"[MeSH Terms]                                                                                                                                                                                                                                                                                                                                                                   | 40,368  |
| 10     | "chronic urticaria"[MeSH Terms]                                                                                                                                                                                                                                                                                                                                                           | 127     |
| 11     | "arthritis, psoriatic"[MeSH Terms]                                                                                                                                                                                                                                                                                                                                                        | 6,226   |
| 12     | "colitis, ulcerative"[MeSH Terms]                                                                                                                                                                                                                                                                                                                                                         | 34,773  |
| 14     | "fibromyalgia"[MeSH Terms]                                                                                                                                                                                                                                                                                                                                                                | 8,517   |
| 15     | "arthritis, juvenile"[MeSH Terms]                                                                                                                                                                                                                                                                                                                                                         | 10,476  |
| 16     | ((ulcer*[Title/Abstract] OR mucos*[Title/Abstract]) AND (colit*[Title/Abstract] OR colon*[Title/Abstract] OR colorec*)) [Title/Abstract] OR (inflamm*[Title/Abstract] AND bowel*[Title/Abstract]) OR proctocolitis[Title/Abstract] OR proctosigmoiditis[Title/Abstract] OR rectocolitis[Title/Abstract] OR rectosigmoiditis[Title/Abstract] OR proctitis[Title/Abstract]                  | 123,250 |
| 17     | "rheumatoid arthritis"[Title/Abstract] OR "arthrosis deformans"[Title/Abstract] OR beauvais[Title/Abstract] OR rheumarthritis[Title/Abstract] OR ((rheum*[Title/Abstract] OR poly*[Title/Abstract] OR inflam*[Title/Abstract]) AND (arthr*[Title/Abstract] OR deforma*[Title/Abstract] OR articular[Title/Abstract]))                                                                     | 174,956 |
| 18     | "ankylosing spondylitis"[Title/Abstract] OR ((anky*[Title/Abstract] AND (spondyl*[Title/Abstract] OR spine[Title/Abstract])) OR bechterew[Title/Abstract] OR bekhterev[Title/Abstract] OR "vertebral ankylosis"[Title/Abstract]                                                                                                                                                           | 16,686  |
| 19     | psoria*[Title/Abstract] OR "willan lepra"[Title/Abstract] OR "psoriatic arthritis"[Title/Abstract] OR "alibert bazin"[Title/Abstract] OR "arthritis psoriatica"[Title/Abstract] OR "chronic urticaria"[Title/Abstract] OR "chronic idiopathic urticaria"[Title/Abstract] OR "chronic spontaneous urticaria"[Title/Abstract] OR ((chronic[Title/Abstract] AND urticaria*[Title/Abstract])) | 54,676  |

|    |                                                                                                                                                                                                                                                                                                                                                                                                                                                                                                                                                                                                                                                                                                                                                                                                                                                                                                                                                                             |           |
|----|-----------------------------------------------------------------------------------------------------------------------------------------------------------------------------------------------------------------------------------------------------------------------------------------------------------------------------------------------------------------------------------------------------------------------------------------------------------------------------------------------------------------------------------------------------------------------------------------------------------------------------------------------------------------------------------------------------------------------------------------------------------------------------------------------------------------------------------------------------------------------------------------------------------------------------------------------------------------------------|-----------|
| 21 | fibromyalgia[Title/Abstract] OR "fibrositic nodule"[Title/Abstract] OR fibrositis[Title/Abstract]                                                                                                                                                                                                                                                                                                                                                                                                                                                                                                                                                                                                                                                                                                                                                                                                                                                                           | 11,045    |
| 22 | "juvenile idiopathic arthritis"[Title/Abstract] OR ((juvenile*[Title/Abstract] AND (arthr*[Title/Abstract] OR rheum*[Title/Abstract] OR polyar*[Title/Abstract])))                                                                                                                                                                                                                                                                                                                                                                                                                                                                                                                                                                                                                                                                                                                                                                                                          | 12,223    |
| 23 | markov*[Title/Abstract] OR (decision[Title/Abstract] AND tree*[Title/Abstract]) OR (decision[Title/Abstract] AND analy*[Title/Abstract]) OR ((incremental[Title/Abstract] OR qaly[Title/Abstract] OR "quality adjusted life years"[Title/Abstract] AND cost*[Title/Abstract]) OR (cost*[Title/Abstract] AND (effect*[Title/Abstract] OR utility*[Title/Abstract] OR benefit[Title/Abstract] OR consequ*[Title/Abstract] OR minimi*[Title/Abstract] OR increment*[Title/Abstract] OR qaly*[Title/Abstract] OR ly[Title/Abstract] OR lys[Title/Abstract] OR "quality adjusted life year*"[Title/Abstract] OR "life year*"))[Title/Abstract] OR icer[Title/Abstract] OR qaly[Title/Abstract] OR "quality adjusted life year*"[Title/Abstract] OR ((markov*[Title/Abstract] OR simulat*[Title/Abstract] OR decisio*[Title/Abstract] OR analy*[Title/Abstract] OR economic*[Title/Abstract] OR transitio*[Title/Abstract] OR state*[Title/Abstract]) AND model*[Title/Abstract]) | 1,827,042 |
| 24 | "economics, pharmaceutical"[MeSH Terms]                                                                                                                                                                                                                                                                                                                                                                                                                                                                                                                                                                                                                                                                                                                                                                                                                                                                                                                                     | 2,957     |
| 25 | "cost benefit analysis"[MeSH Terms]                                                                                                                                                                                                                                                                                                                                                                                                                                                                                                                                                                                                                                                                                                                                                                                                                                                                                                                                         | 82,218    |
| 26 | "decision trees"[MeSH Terms]                                                                                                                                                                                                                                                                                                                                                                                                                                                                                                                                                                                                                                                                                                                                                                                                                                                                                                                                                | 11,255    |
| 27 | "models, economic"[MeSH Terms]                                                                                                                                                                                                                                                                                                                                                                                                                                                                                                                                                                                                                                                                                                                                                                                                                                                                                                                                              | 15,243    |
| 28 | "markov chains"[MeSH Terms]                                                                                                                                                                                                                                                                                                                                                                                                                                                                                                                                                                                                                                                                                                                                                                                                                                                                                                                                                 | 14,547    |
| 29 | "patient simulation"[MeSH Terms]                                                                                                                                                                                                                                                                                                                                                                                                                                                                                                                                                                                                                                                                                                                                                                                                                                                                                                                                            | 5,080     |
| 30 | "cost control"[MeSH Terms]                                                                                                                                                                                                                                                                                                                                                                                                                                                                                                                                                                                                                                                                                                                                                                                                                                                                                                                                                  | 33,282    |
| 31 | "drug costs"[MeSH Terms]                                                                                                                                                                                                                                                                                                                                                                                                                                                                                                                                                                                                                                                                                                                                                                                                                                                                                                                                                    | 16,245    |
| 32 | "patient acceptance of health care"[MeSH Terms]                                                                                                                                                                                                                                                                                                                                                                                                                                                                                                                                                                                                                                                                                                                                                                                                                                                                                                                             | 154,146   |
| 33 | "hospital costs"[MeSH Terms]                                                                                                                                                                                                                                                                                                                                                                                                                                                                                                                                                                                                                                                                                                                                                                                                                                                                                                                                                | 11,205    |
| 34 | "health care costs"[MeSH Terms]                                                                                                                                                                                                                                                                                                                                                                                                                                                                                                                                                                                                                                                                                                                                                                                                                                                                                                                                             | 66,139    |
| 35 | "resource allocation"[MeSH Terms]                                                                                                                                                                                                                                                                                                                                                                                                                                                                                                                                                                                                                                                                                                                                                                                                                                                                                                                                           | 17,716    |
| 36 | "budgets"[MeSH Terms]                                                                                                                                                                                                                                                                                                                                                                                                                                                                                                                                                                                                                                                                                                                                                                                                                                                                                                                                                       | 13,762    |
| 37 | "cost of illness"[MeSH Terms]                                                                                                                                                                                                                                                                                                                                                                                                                                                                                                                                                                                                                                                                                                                                                                                                                                                                                                                                               | 27,702    |
| 38 | "fees and charges"[MeSH Terms]                                                                                                                                                                                                                                                                                                                                                                                                                                                                                                                                                                                                                                                                                                                                                                                                                                                                                                                                              | 30,458    |
| 39 | (healthcare[Title/Abstract] AND cost*[Title/Abstract]) OR (unit[Title/Abstract] AND cost*[Title/Abstract]) OR (cost*[Title/Abstract] AND (treat*[Title/Abstract] OR therap*[Title/Abstract])) OR ((total[Title/Abstract] OR direct[Title/Abstract] OR indirect[Title/Abstract] OR medical[Title/Abstract] OR drug[Title/Abstract] OR administration[Title/Abstract] OR laborat*[Title/Abstract] OR diagnos*[Title/Abstract] OR illness[Title/Abstract]) AND (cost[Title/Abstract] OR costs[Title/Abstract])) OR "economic burden"[Title/Abstract] OR price[Title/Abstract] OR pricing[Title/Abstract] OR fee[Title/Abstract] OR fees[Title/Abstract] OR budget[Title/Abstract] OR budgets[Title/Abstract]                                                                                                                                                                                                                                                                   | 443,442   |
| 40 | "dermatitis, atopic"[MeSH Terms]                                                                                                                                                                                                                                                                                                                                                                                                                                                                                                                                                                                                                                                                                                                                                                                                                                                                                                                                            | 20,120    |
| 41 | "neurodermatitis"[MeSH Terms]                                                                                                                                                                                                                                                                                                                                                                                                                                                                                                                                                                                                                                                                                                                                                                                                                                                                                                                                               | 1,535     |
| 42 | "eczema"[MeSH Terms]                                                                                                                                                                                                                                                                                                                                                                                                                                                                                                                                                                                                                                                                                                                                                                                                                                                                                                                                                        | 11,260    |
| 43 | sulzberger[Title/Abstract] OR neurodermatitis[Title/Abstract] OR besniers*[Title/Abstract] OR ((atopic[Title/Abstract] OR endogenous[Title/Abstract]) AND (dermat*[Title/Abstract] OR eczema*[Title/Abstract])) OR eczema*[Title/Abstract] OR dermatitis[Title/Abstract]                                                                                                                                                                                                                                                                                                                                                                                                                                                                                                                                                                                                                                                                                                    | 76,905    |

|    |                                                                                                                                                                                                                                                                                                          |           |
|----|----------------------------------------------------------------------------------------------------------------------------------------------------------------------------------------------------------------------------------------------------------------------------------------------------------|-----------|
| 44 | #1 OR #2 OR #3 OR #4 OR #5 OR #6 OR #7 OR #8 OR #9 OR #10 OR #11 OR #12 OR #14 OR #15 OR #16 OR #17 OR #18 OR #21 OR #22                                                                                                                                                                                 | 509,821   |
| 45 | #23 OR #24 OR #26 OR #27 OR #28 OR #29                                                                                                                                                                                                                                                                   | 1,872,840 |
| 46 | #30 OR #31 OR #32 OR #33 OR #34 OR #35 OR #36 OR #37 OR #38 OR #39                                                                                                                                                                                                                                       | 1,037,181 |
| 47 | #40 OR #41 OR #42 OR #43                                                                                                                                                                                                                                                                                 | 137,433   |
| 48 | "antibodies, monoclonal"[MeSH Terms] OR "tumor necrosis factor inhibitors"[MeSH Terms] OR "immunotherapy"[MeSH Terms] OR "biological therapy"[MeSH Terms] OR "receptors, tumor necrosis factor"[MeSH Terms] OR "interleukin 1 receptor antagonist protein"[MeSH Terms] OR "immunoconjugates"[MeSH Terms] | 942,303   |
| 49 | #45 AND #48                                                                                                                                                                                                                                                                                              | 54,359    |
| 50 | #46 OR #49                                                                                                                                                                                                                                                                                               | 1,074,161 |
| 51 | (publisher[sb] NOT pubstatusnihms NOT pubstatuspmcsd NOT pmcbook) OR (pubstatusaheadofprint)                                                                                                                                                                                                             | 379,494   |
| 52 | #47 AND #50 AND #51                                                                                                                                                                                                                                                                                      | 104       |
| 53 | #44 AND #45 AND #48 AND #51                                                                                                                                                                                                                                                                              | 796       |
| 54 | #52 OR #53                                                                                                                                                                                                                                                                                               | 900       |

**Table S3: Cochrane searches (CDSR and CENTRAL) 26 Oct 2020**

| S. No. | Query                                                                                                                                                                                                                                        | Results |
|--------|----------------------------------------------------------------------------------------------------------------------------------------------------------------------------------------------------------------------------------------------|---------|
| 1      | MeSH descriptor: [Crohn Disease] explode all trees                                                                                                                                                                                           | 1,586   |
| 2      | [mh "Inflammatory Bowel Diseases"[m]]                                                                                                                                                                                                        | 1,994   |
| 3      | cleron disease:ab,ti,kw OR crohn*:ab,ti,kw OR ((regional* NEAR/2 enter*):ab,ti,kw)                                                                                                                                                           | 4,784   |
| 4      | MeSH descriptor: [Lupus Erythematosus, Systemic] explode all trees                                                                                                                                                                           | 1,034   |
| 5      | dermatovisceritism:ab,ti,kw OR erythematodes*:ab,ti,kw OR lupovisceritis:ab,ti,kw OR "osler libman*":ab,ti,kw OR sle:ab,ti,kw OR "s.l.e":ab,ti,kw OR "s.l.e.":ab,ti,kw                                                                       | 1,687   |
| 6      | (lupus NEAR/2 (dissesemina* OR erythema*)):ab,ti,kw                                                                                                                                                                                          | 2,350   |
| 7      | MeSH descriptor: [Arthritis, Rheumatoid] explode all trees                                                                                                                                                                                   | 6,095   |
| 8      | MeSH descriptor: [Spondylitis, Ankylosing] explode all trees                                                                                                                                                                                 | 687     |
| 9      | MeSH descriptor: [Psoriasis] explode all trees                                                                                                                                                                                               | 3,293   |
| 10     | MeSH descriptor: [Chronic Urticaria] explode all trees                                                                                                                                                                                       | 5       |
| 11     | MeSH descriptor: [Arthritis, Psoriatic] explode all trees                                                                                                                                                                                    | 437     |
| 12     | MeSH descriptor: [Colitis, Ulcerative] explode all trees                                                                                                                                                                                     | 1,578   |
| 14     | MeSH descriptor: [Fibromyalgia] explode all trees                                                                                                                                                                                            | 1,378   |
| 15     | MeSH descriptor: [Arthritis, Juvenile] explode all trees                                                                                                                                                                                     | 297     |
| 16     | ((ulcer* OR mucos*) NEAR/2 (colit* OR colon* OR colorec*)):ab,ti,kw OR (inflamm* NEAR/2 bowel*):ab,ti,kw OR proctocolitis:ab,ti,kw OR proctosigmoiditis:ab,ti,kw OR rectocolitis:ab,ti,kw OR rectosigmoiditis:ab,ti,kw OR proctitis:ab,ti,kw | 7,615   |
| 17     | rheumatoid arthritis:ab,ti,kw OR "arthrosis deformans":ab,ti,kw OR beauvais:ab,ti,kw OR rheumarthritis:ab,ti,kw OR (((rheum* OR poly* OR inflam*) NEAR/2 (arthr* OR deforma* OR articular)):ab,ti,kw)                                        | 16,106  |
| 18     | ankylosing spondylitis:ab,ti,kw OR ((anky* NEAR/2 (spondyl* OR spine)):ab,ti,kw) OR bechterew:ab,ti,kw OR bekhterevo:ab,ti,kw OR "vertebral ankylosis":ab,ti,kw                                                                              | 2,016   |

|    |                                                                                                                                                                                                                                                                                                                                                                                                                                                                                                                                                 |        |
|----|-------------------------------------------------------------------------------------------------------------------------------------------------------------------------------------------------------------------------------------------------------------------------------------------------------------------------------------------------------------------------------------------------------------------------------------------------------------------------------------------------------------------------------------------------|--------|
| 19 | psoria*:ab,ti,kw OR "willan lepra":ab,ti,kw OR "psoriatic arthritis":ab,ti,kw OR "alibert bazin*":ab,ti,kw OR "arthritis psoriatica":ab,ti,kw OR "chronic urticaria":ab,ti,kw OR "chronic idiopathic urticaria":ab,ti,kw OR "chronic spontaneous urticaria":ab,ti,kw OR ((chronic NEAR/3 urticaria*):ab,ti,kw)                                                                                                                                                                                                                                  | 9,588  |
| 21 | fibromyalgia:ab,ti,kw OR "fibrositic nodule":ab,ti,kw OR fibrositis:ab,ti,kw                                                                                                                                                                                                                                                                                                                                                                                                                                                                    | 3,007  |
| 22 | juvenile idiopathic arthritis:ab,ti,kw OR ((juvenile* NEAR/2 (arthr* OR rheum* OR polyar*)):ab,ti,kw)                                                                                                                                                                                                                                                                                                                                                                                                                                           | 867    |
| 23 | markov*:ab,ti,kw OR ((decision NEXT/2 tree*):ab,ti,kw) OR ((decision NEXT/2 analy*):ab,ti,kw) OR (((incremental OR qaly OR "quality adjusted life years") NEAR/3 cost*):ab,ti,kw) OR ((cost* NEAR/3 (effect* OR utility* OR benefit OR conseq* OR minimi* OR increment* OR qaly* OR ly* OR "quality adjusted life year*" OR "life year*")):ab,ti,kw) OR icer:ab,ti,kw OR qaly:ab,ti,kw OR "quality adjusted life year*":ab,ti,kw OR (((markov* OR simulat* OR decisio* OR analy* OR economic* OR transitio* OR state*) NEAR/3 model*):ab,ti,kw) | 45,389 |
| 24 | MeSH descriptor: [Economics, Pharmaceutical] explode all trees                                                                                                                                                                                                                                                                                                                                                                                                                                                                                  | 65     |
| 25 | MeSH descriptor: [Cost-Benefit Analysis] explode all trees                                                                                                                                                                                                                                                                                                                                                                                                                                                                                      | 6,928  |
| 26 | MeSH descriptor: [Cost-Benefit Analysis] explode all trees                                                                                                                                                                                                                                                                                                                                                                                                                                                                                      | 6,928  |
| 27 | MeSH descriptor: [Decision Trees] explode all trees                                                                                                                                                                                                                                                                                                                                                                                                                                                                                             | 160    |
| 28 | MeSH descriptor: [Models, Economic] explode all trees                                                                                                                                                                                                                                                                                                                                                                                                                                                                                           | 352    |
| 29 | MeSH descriptor: [Markov Chains] explode all trees                                                                                                                                                                                                                                                                                                                                                                                                                                                                                              | 265    |
| 30 | MeSH descriptor: [Patient Simulation] explode all trees                                                                                                                                                                                                                                                                                                                                                                                                                                                                                         | 465    |
| 31 | MeSH descriptor: [Cost Control] explode all trees                                                                                                                                                                                                                                                                                                                                                                                                                                                                                               | 581    |
| 32 | MeSH descriptor: [Health Care Costs] explode all trees                                                                                                                                                                                                                                                                                                                                                                                                                                                                                          | 3,414  |
| 33 | MeSH descriptor: [Drug Costs] explode all trees                                                                                                                                                                                                                                                                                                                                                                                                                                                                                                 | 760    |
| 34 | MeSH descriptor: [Hospital Costs] explode all trees                                                                                                                                                                                                                                                                                                                                                                                                                                                                                             | 617    |
| 35 | MeSH descriptor: [Cost of Illness] explode all trees                                                                                                                                                                                                                                                                                                                                                                                                                                                                                            | 813    |
| 36 | MeSH descriptor: [Patient Acceptance of Health Care] explode all trees                                                                                                                                                                                                                                                                                                                                                                                                                                                                          | 17,267 |
| 37 | MeSH descriptor: [Resource Allocation] explode all trees                                                                                                                                                                                                                                                                                                                                                                                                                                                                                        | 73     |
| 38 | MeSH descriptor: [Budgets] explode all trees                                                                                                                                                                                                                                                                                                                                                                                                                                                                                                    | 27     |
| 39 | MeSH descriptor: [Fees and Charges] explode all trees                                                                                                                                                                                                                                                                                                                                                                                                                                                                                           | 250    |
| 40 | ((healthcare NEXT/1 cost*):ab,ti,kw) OR ((unit NEXT/1 cost*):ab,ti,kw) OR ((cost* NEAR/3 (treat* OR therap*)):ab,ti,kw) OR (((total OR direct OR indirect OR medical OR drug OR administration OR laborat* OR diagnos* OR illness) NEAR/2 (cost OR costs)):ab,ti,kw) OR 'economic burden':ab,ti,kw OR price:ab,ti,kw OR pricing:ab,ti,kw OR (fee OR fees):ab,ti,kw OR (budget OR budgets):ab,ti,kw                                                                                                                                              | 23,275 |
| 41 | MeSH descriptor: [Dermatitis, Atopic] explode all trees                                                                                                                                                                                                                                                                                                                                                                                                                                                                                         | 1,778  |
| 42 | MeSH descriptor: [Neurodermatitis] explode all trees                                                                                                                                                                                                                                                                                                                                                                                                                                                                                            | 70     |
| 43 | MeSH descriptor: [Eczema] explode all trees                                                                                                                                                                                                                                                                                                                                                                                                                                                                                                     | 1,049  |
| 44 | sulzberger:ab,ti,kw OR neurodermatitis:ab,ti,kw OR besniers*:ab,ti,kw OR (((atopic OR endogenous) NEAR/3 (dermat* OR eczema*)):ab,ti,kw) OR eczema*:ab,ti,kw OR dermatitis:ab,ti,kw                                                                                                                                                                                                                                                                                                                                                             | 9,928  |
| 45 | #1 OR #2 OR #3 OR #4 OR #5 OR #6 OR #7 OR #8 OR #9 OR #10 OR #11 OR #12 OR #14 OR #15 OR #16 OR #17 OR #18 OR #19 OR #21 OR #22                                                                                                                                                                                                                                                                                                                                                                                                                 | 42,449 |
| 46 | #23 OR #24 OR #25 OR #26 OR #27 OR #28 OR #29 OR #30                                                                                                                                                                                                                                                                                                                                                                                                                                                                                            | 45,857 |
| 47 | #41 OR #42 OR #43 OR #44 OR #9 OR #10 OR #11 OR #19                                                                                                                                                                                                                                                                                                                                                                                                                                                                                             | 18,945 |

|    |                                                                                                               |        |
|----|---------------------------------------------------------------------------------------------------------------|--------|
| 48 | MeSH descriptor: [Antibodies, Monoclonal] explode all trees                                                   | 13,160 |
| 49 | MeSH descriptor: [Tumor Necrosis Factor Inhibitors] explode all trees                                         | 36     |
| 50 | MeSH descriptor: [Immunotherapy] explode all trees                                                            | 7,965  |
| 51 | MeSH descriptor: [Biological Therapy] explode all trees                                                       | 17,477 |
| 52 | MeSH descriptor: [Receptors, Tumor Necrosis Factor] explode all trees                                         | 1,282  |
| 53 | MeSH descriptor: [Interleukin 1 Receptor Antagonist Protein] explode all trees                                | 307    |
| 54 | MeSH descriptor: [Immunoconjugates] explode all trees                                                         | 384    |
| 55 | #48 OR #49 OR #50 OR #51 OR #52 OR #53 OR #54                                                                 | 31,601 |
| 56 | #31 OR #32 OR #33 OR #34 OR #35 OR #36 OR #37 OR #38 OR #39 OR #40 OR (#46 AND #54)                           | 41,476 |
| 57 | #55 AND #45 AND #46 with Publication Year from 2010 to 2020, in Trials                                        | 87     |
| 58 | #56 AND #47 with Publication Year from 2010 to 2020, in Trials                                                | 218    |
| 59 | #55 AND #45 AND #46 with Cochrane Library publication date Between Jan 2010 and Dec 2020, in Cochrane Reviews | 4      |
| 60 | #56 AND #47 with Cochrane Library publication date Between Jan 2010 and Dec 2020, in Cochrane Reviews         | 5      |



# Appendix 2: A list of data extracted

Please refer to separate Excel file for Appendix 2.

## Appendix 3: Redefined variables used in the multivariate analysis

| Category          | Variables                                 | Definition                                                                                     | Number of studies |
|-------------------|-------------------------------------------|------------------------------------------------------------------------------------------------|-------------------|
| Disease area      | Rheumatoid arthritis                      | If disease of interest is rheumatoid arthritis                                                 | 74                |
|                   | Psoriasis                                 | If disease of interest is psoriasis                                                            | 64                |
|                   | Inflammatory bowel disease                | If diseases of interest are ulcerative colitis and Crohn's disease                             | 45                |
|                   | Others                                    | If diseases of interest are other than above                                                   | 17                |
| Publication year  | 2010–2013                                 | If study of interest was published from 2010 to 2013                                           | 53                |
|                   | 2014–2017                                 | If study of interest was published from 2014 to 2017                                           | 60                |
|                   | 2018–2020                                 | If study of interest was published from 2018 to 2020                                           | 87                |
| Region            | North America                             | If countries of interest are categorized North America by Ministry of Foreign Affairs of Japan | 55                |
|                   | Europe                                    | If countries of interest are categorized Europe by Ministry of Foreign Affairs of Japan        | 108               |
|                   | Asia                                      | If countries of interest are categorized Asia by Ministry of Foreign Affairs of Japan          | 27                |
|                   | Others                                    | If countries of interest are other than above                                                  | 10                |
| Economic analysis | CEA                                       | If study of interest conducted a CEA                                                           | 54                |
|                   | CUA                                       | If study of interest conducted a CUA                                                           | 137               |
|                   | CEA + CUA                                 | If study of interest conducted a CEA and CUA                                                   | 9                 |
| Study sponsor     | Pharmaceutical company                    | If study of interest was sponsored by a pharmaceutical company                                 | 124               |
|                   | Non-pharmaceutical company and no funding | If study of interest was sponsored by a non-pharmaceutical company or no funding               | 51                |
|                   | Not reported                              | If study of interest did not report the sponsor                                                | 25                |
| Model type        | Markov                                    | If study of interest used Markov model                                                         | 99                |
|                   | Decision analytic/decision tree           | If study of interest used a decision analytic/decision tree model                              | 22                |
|                   | Simulation model                          | If study of interest used a simulation model                                                   | 33                |
|                   | Non-modelling study                       | If study of interest was not model-based                                                       | 43                |
|                   | Not reported                              | If study of interest did not report details regarding modelling                                | 3                 |
| Intervention(s)   | Biologics and/or JAKi                     | If interventions of interest are included biologics and/or JAKi                                | 171               |
|                   | Others                                    | If interventions of interest include other than above                                          | 29                |

## Appendix 4: Details for discount rate, cost year, and geographical region of included studies

| Disease                    |                                        | Total       | Rheumatoid arthritis* | Psoriasis* | Ulcerative colitis | Crohn's disease* | Ankylosing spondylitis | Chronic idiopathic urticaria | Systemic lupus erythematosus | Fibromyalgia |          |
|----------------------------|----------------------------------------|-------------|-----------------------|------------|--------------------|------------------|------------------------|------------------------------|------------------------------|--------------|----------|
| <b>Number of studies</b>   |                                        | 200 (100%)  | 74 (37.0%)            | 64 (32.0%) | 27 (13.5%)         | 18 (9.0%)        | 9 (4.5%)               | 2 (1.0%)                     | 1 (0.5%)                     | 5 (2.5%)     |          |
| <b>Discount rate</b>       | 3%                                     | 50 (25.0%)  | 31 (15.5%)            | 11 (5.5%)  | 3 (1.5%)           | 3 (1.5%)         | 1 (0.5%)               | 0 (0.0%)                     | 1 (0.5%)                     | 0 (0.0%)     |          |
|                            | 3.5%                                   | 32 (16.0%)  | 9 (4.5%)              | 10 (5.0%)  | 7 (3.5%)           | 2 (1.0%)         | 2 (1.0%)               | 1 (0.5%)                     | 0 (0.0%)                     | 1 (0.5%)     |          |
|                            | 5%                                     | 15 (7.5%)   | 4 (2.0%)              | 4 (2.0%)   | 4 (2.0%)           | 1 (0.5%)         | 1 (0.5%)               | 0 (0.0%)                     | 0 (0.0%)                     | 1 (0.5%)     |          |
|                            | Others <sup>†</sup>                    | 25 (12.5%)  | 7 (3.5%)              | 3 (1.5%)   | 8 (4.0%)           | 3 (1.5%)         | 3 (1.5%)               | 1 (0.5%)                     | 0 (0.0%)                     | 0 (0.0%)     |          |
|                            | No discount                            | 17 (8.5%)   | 6 (3.0%)              | 4 (2.0%)   | 2 (1.0%)           | 4 (2.0%)         | 0 (0.0%)               | 0 (0.0%)                     | 0 (0.0%)                     | 1 (0.5%)     |          |
|                            | Not reported                           | 61 (30.5%)  | 17 (8.5%)             | 32 (16.0%) | 3 (1.5%)           | 5 (2.5%)         | 2 (1.0%)               | 0 (0.0%)                     | 0 (0.0%)                     | 2 (1.0%)     |          |
| <b>Cost year</b>           | 2006–2010                              | 42 (21.0%)  | 21 (10.5%)            | 8 (4.0%)   | 4 (2.0%)           | 4 (2.0%)         | 3 (1.5%)               | 0 (0.0%)                     | 0 (0.0%)                     | 2 (1.0%)     |          |
|                            | 2011–2015                              | 55 (27.5%)  | 22 (11.0%)            | 12 (6.0%)  | 11 (5.5%)          | 5 (2.5%)         | 1 (0.5%)               | 1 (0.5%)                     | 1 (0.5%)                     | 2 (1.0%)     |          |
|                            | 2016–2020                              | 64 (32.0%)  | 15 (7.5%)             | 28 (14.0%) | 11 (5.5%)          | 7 (3.5%)         | 3 (1.5%)               | 0 (0.0%)                     | 0 (0.0%)                     | 0 (0.0%)     |          |
|                            | Not reported                           | 39 (19.5%)  | 16 (8.0%)             | 16 (8.0%)  | 1 (0.5%)           | 2 (1.0%)         | 2 (1.0%)               | 1 (0.5%)                     | 0 (0.0%)                     | 1 (0.5%)     |          |
| <b>Geographical region</b> | <b>North America</b>                   | Canada      | 7 (3.5%)              | 0 (0.0%)   | 2 (1.0%)           | 3 (1.5%)         | 1 (0.5%)               | 1 (0.5%)                     | 0 (0.0%)                     | 0 (0.0%)     | 0 (0.0%) |
|                            |                                        | US          | 48 (24.0%)            | 15 (7.5%)  | 23 (11.5%)         | 5 (2.5%)         | 4 (2.0%)               | 0 (0.0%)                     | 0 (0.0%)                     | 0 (0.0%)     | 1 (0.5%) |
|                            | <b>Latin America and the Caribbean</b> | Argentina   | 1 (0.5%)              | 0 (0.0%)   | 1 (0.5%)           | 0 (0.0%)         | 0 (0.0%)               | 0 (0.0%)                     | 0 (0.0%)                     | 0 (0.0%)     | 0 (0.0%) |
|                            |                                        | Brazil      | 2 (1.0%)              | 1 (0.5%)   | 1 (0.5%)           | 0 (0.0%)         | 0 (0.0%)               | 0 (0.0%)                     | 0 (0.0%)                     | 0 (0.0%)     | 0 (0.0%) |
|                            |                                        | Colombia    | 1 (0.5%)              | 1 (0.5%)   | 0 (0.0%)           | 0 (0.0%)         | 0 (0.0%)               | 0 (0.0%)                     | 0 (0.0%)                     | 0 (0.0%)     | 0 (0.0%) |
|                            |                                        | Mexico      | 1 (0.5%)              | 0 (0.0%)   | 0 (0.0%)           | 0 (0.0%)         | 0 (0.0%)               | 0 (0.0%)                     | 0 (0.0%)                     | 0 (0.0%)     | 1 (0.5%) |
|                            | <b>Europe</b>                          | Finland     | 6 (3.0%)              | 4 (2.0%)   | 1 (0.5%)           | 0 (0.0%)         | 0 (0.0%)               | 1 (0.5%)                     | 0 (0.0%)                     | 0 (0.0%)     | 0 (0.0%) |
|                            |                                        | France      | 4 (2.0%)              | 3 (1.5%)   | 0 (0.0%)           | 0 (0.0%)         | 0 (0.0%)               | 1 (0.5%)                     | 0 (0.0%)                     | 0 (0.0%)     | 0 (0.0%) |
|                            |                                        | Germany     | 9 (4.5%)              | 4 (2.0%)   | 4 (2.0%)           | 0 (0.0%)         | 0 (0.0%)               | 1 (0.5%)                     | 0 (0.0%)                     | 0 (0.0%)     | 0 (0.0%) |
|                            |                                        | Greece      | 3 (1.5%)              | 2 (1.0%)   | 0 (0.0%)           | 1 (0.5%)         | 0 (0.0%)               | 0 (0.0%)                     | 0 (0.0%)                     | 0 (0.0%)     | 0 (0.0%) |
|                            |                                        | Italy       | 9 (4.5%)              | 4 (2.0%)   | 3 (1.5%)           | 0 (0.0%)         | 1 (0.5%)               | 0 (0.0%)                     | 0 (0.0%)                     | 1 (0.5%)     | 0 (0.0%) |
|                            |                                        | Netherlands | 15 (7.5%)             | 6 (3.0%)   | 2 (1.0%)           | 4 (2.0%)         | 0 (0.0%)               | 2 (1.0%)                     | 1 (0.5%)                     | 0 (0.0%)     | 0 (0.0%) |
|                            |                                        | Poland      | 6 (3.0%)              | 1 (0.5%)   | 0 (0.0%)           | 4 (2.0%)         | 1 (0.5%)               | 0 (0.0%)                     | 0 (0.0%)                     | 0 (0.0%)     | 0 (0.0%) |
|                            |                                        | Scotland    | 1 (0.5%)              | 1 (0.5%)   | 0 (0.0%)           | 0 (0.0%)         | 0 (0.0%)               | 0 (0.0%)                     | 0 (0.0%)                     | 0 (0.0%)     | 0 (0.0%) |
|                            |                                        | Serbia      | 2 (1.0%)              | 2 (1.0%)   | 0 (0.0%)           | 0 (0.0%)         | 0 (0.0%)               | 0 (0.0%)                     | 0 (0.0%)                     | 0 (0.0%)     | 0 (0.0%) |
|                            |                                        | Spain       | 12 (6.0%)             | 3 (1.5%)   | 4 (2.0%)           | 2 (1.0%)         | 1 (0.5%)               | 0 (0.0%)                     | 0 (0.0%)                     | 0 (0.0%)     | 2 (1.0%) |
|                            |                                        | Sweden      | 10 (5.0%)             | 6 (3.0%)   | 2 (1.0%)           | 0 (0.0%)         | 2 (1.0%)               | 0 (0.0%)                     | 0 (0.0%)                     | 0 (0.0%)     | 0 (0.0%) |
|                            |                                        | UK          | 30 (15.0%)            | 6 (3.0%)   | 11 (5.5%)          | 5 (2.5%)         | 4 (2.0%)               | 2 (1.0%)                     | 1 (0.5%)                     | 0 (0.0%)     | 1 (0.5%) |
|                            | <b>Middle East and North Africa</b>    | Malta       | 1 (0.5%)              | 1 (0.5%)   | 0 (0.0%)           | 0 (0.0%)         | 0 (0.0%)               | 0 (0.0%)                     | 0 (0.0%)                     | 0 (0.0%)     | 0 (0.0%) |
| Iran                       |                                        | 4 (2.0%)    | 3 (1.5%)              | 0 (0.0%)   | 1 (0.5%)           | 0 (0.0%)         | 0 (0.0%)               | 0 (0.0%)                     | 0 (0.0%)                     | 0 (0.0%)     |          |

| Disease               |             | Total         | Rheumatoid arthritis* | Psoriasis* | Ulcerative colitis | Crohn's disease* | Ankylosing spondylitis | Chronic idiopathic urticaria | Systemic lupus erythematosus | Fibromyalgia |
|-----------------------|-------------|---------------|-----------------------|------------|--------------------|------------------|------------------------|------------------------------|------------------------------|--------------|
| East Asia and Pacific | Australia   | 1 (0.5%)      | 0 (0.0%)              | 1 (0.5%)   | 0 (0.0%)           | 0 (0.0%)         | 0 (0.0%)               | 0 (0.0%)                     | 0 (0.0%)                     | 0 (0.0%)     |
|                       | China       | 7 (3.5%)      | 6 (3.0%)              | 1 (0.5%)   | 0 (0.0%)           | 0 (0.0%)         | 0 (0.0%)               | 0 (0.0%)                     | 0 (0.0%)                     | 0 (0.0%)     |
|                       | Japan       | 9 (4.5%)      | 2 (1.0%)              | 5 (2.5%)   | 1 (0.5%)           | 1 (0.5%)         | 0 (0.0%)               | 0 (0.0%)                     | 0 (0.0%)                     | 0 (0.0%)     |
|                       | South Korea | 3 (1.5%)      | 2 (1.0%)              | 0 (0.0%)   | 0 (0.0%)           | 0 (0.0%)         | 1 (0.5%)               | 0 (0.0%)                     | 0 (0.0%)                     | 0 (0.0%)     |
|                       | Taiwan      | 3 (1.5%)      | 1 (0.5%)              | 2 (1.0%)   | 0 (0.0%)           | 0 (0.0%)         | 0 (0.0%)               | 0 (0.0%)                     | 0 (0.0%)                     | 0 (0.0%)     |
|                       | Thailand    | 1 (0.5%)      | 0 (0.0%)              | 0 (0.0%)   | 0 (0.0%)           | 1 (0.5%)         | 0 (0.0%)               | 0 (0.0%)                     | 0 (0.0%)                     | 0 (0.0%)     |
|                       | Other       | Multinational | 4 (2.0%)              | 0 (0.0%)   | 1 (0.5%)           | 1 (0.5%)         | 2 (1.0%)               | 0 (0.0%)                     | 0 (0.0%)                     | 0 (0.0%)     |

**Notes:** \*A single study reported data for three indications: Crohn's disease, psoriasis, and rheumatoid arthritis (Liu et al., 2012).  
† Discount rates other than 3%, 3.5% and 5% were listed as "Others".

## Appendix 5: Quality assessment of included studies using CHEERS checklist

Figure S1: Summary of quality assessment of included studies using CHEERS checklist

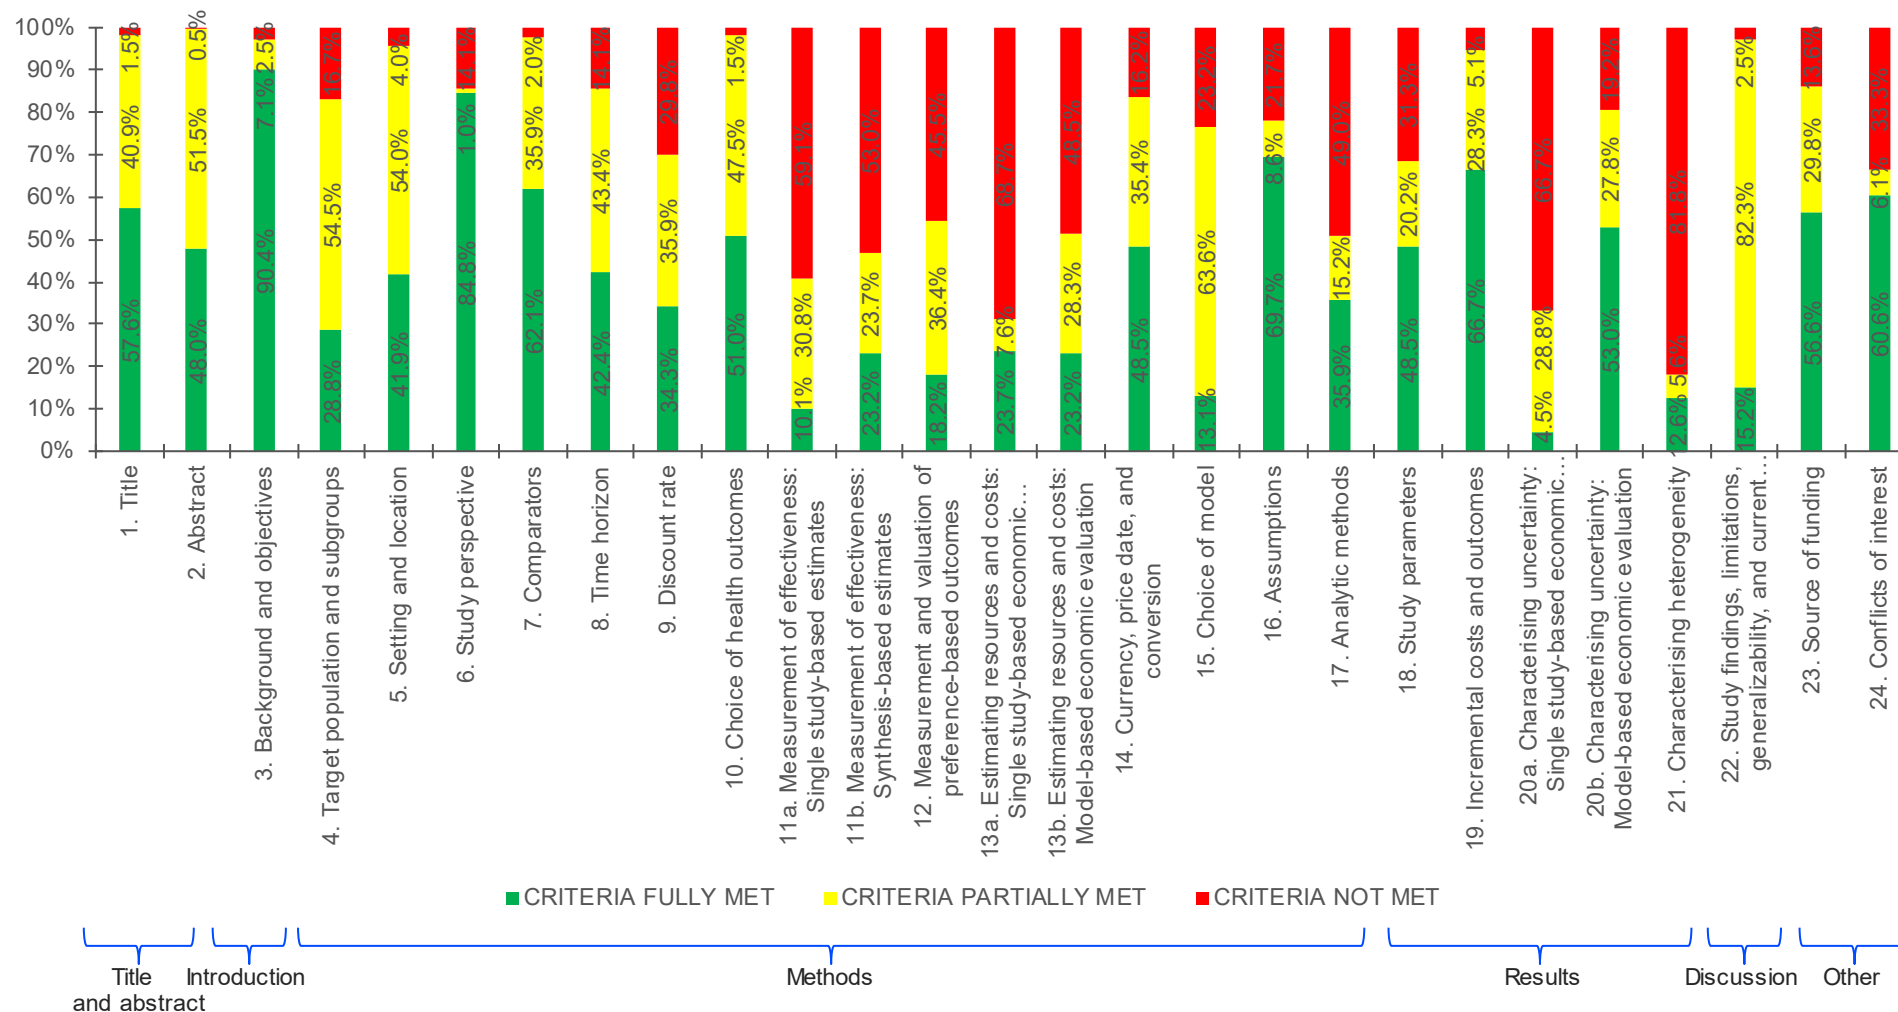

**Table S4: Detailed results of quality assessment of included studies using CHEERS checklist**

| Question No.       | 1  | 2  | 3  | 4  | 5  | 6  | 7  | 8  | 9  | 10 | 11 a | 11 b | 12 | 13 a | 13 b | 14 | 15 | 16 | 17 | 18 | 19 | 20 a | 20 b | 21 | 22 | 23 | 24 |
|--------------------|----|----|----|----|----|----|----|----|----|----|------|------|----|------|------|----|----|----|----|----|----|------|------|----|----|----|----|
| Study Detail       |    |    |    |    |    |    |    |    |    |    |      |      |    |      |      |    |    |    |    |    |    |      |      |    |    |    |    |
| Knight 2012        | FS | FS | FS | PS | FS | FS | FS | FS | NS | FS | PS   | NA   | FS | NA   | FS   | PS | PS | FS | FS | FS | FS | NA   | FS   | FS | PS | FS | NS |
| Lee 2015           | FS | FS | FS | PS | FS | FS | FS | NS | PS | PS | FS   | NA   | NA | NA   | PS   | NA | PS | FS | NS | FS | FS | NS   | PS   | NS | PS | PS | FS |
| Augustin 2018      | FS | PS | FS | PS | PS | FS | PS | PS | NS | FS | NA   | FS   | NS | FS   | NS   | PS | PS | FS | NS | FS | PS | PS   | PS   | NS | PS | PS | FS |
| Van De Laar 2020   | FS | FS | FS | NS | FS | FS | FS | FS | FS | FS | NA   | PS   | FS | NA   | FS   | FS | PS | FS | NS | FS | FS | NA   | FS   | NS | FS | FS | FS |
| Johansson 2018     | FS | FS | FS | FS | PS | FS | FS | FS | FS | FS | NA   | FS   | FS | NA   | FS   | FS | FS | FS | NS | FS | FS | NA   | FS   | NS | PS | FS | FS |
| Kostic 2017        | FS | PS | FS | NS | FS | FS | PS | PS | PS | PS | PS   | NA   | NS | NS   | NS   | PS | PS | PS | NS | FS | PS | NS   | FS   | NS | NS | PS | NS |
| Bansback 2017      | PS | PS | FS | FS | FS | FS | PS | PS | PS | PS | NA   | FS   | PS | FS   | NS   | PS | PS | NS | FS | FS | FS | NS   | FS   | NS | FS | PS | NS |
| Bungey 2020        | PS | FS | FS | PS | PS | FS | FS | FS | FS | FS | NA   | PS   | NA | NA   | FS   | FS | FS | FS | NS | FS | FS | NA   | FS   | NS | PS | FS | FS |
| Valle-Mercado 2013 | FS | PS | FS | PS   | NA   | NS | NA   | NA   | FS | PS | NA | FS | FS | FS | NA   | FS   | FS | PS | FS | NS |
| Vanier 2017        | FS | PS | FS | FS | FS | FS | PS | NS | FS | PS | PS   | PS   | PS | NA   | NA   | FS | NA | NA | FS | PS | FS | PS   | NA   | NS | PS | PS | FS |
| Said 2013          | PS | PS | FS | PS | FS | NS | PS | NS | NS | FS | NA   | NA   | PS | NA   | NA   | PS | NA | NA | NS | NS | FS | NS   | NA   | NA | PS | NS | FS |
| Stevenson 2017     | PS | PS | PS | NS | PS | FS | PS | PS | PS | PS | NA   | PS   | NS | NS   | NS   | NS | PS | FS | NA | PS | PS | PS   | FS   | NA | PS | PS | NS |
| Sawyer 2013        | PS | PS | FS | PS | PS | FS | PS | FS | PS | FS | NA   | FS   | PS | FS   | NS   | FS | PS | FS | NS | FS | FS | PS   | PS   | NS | PS | PS | FS |
| Kobelt 2011        | PS | PS | PS | FS | PS | FS | PS | FS | PS | PS | PS   | NA   | PS | NA   | PS   | FS | PS | FS | PS | PS | PS | NS   | PS   | NS | FS | PS | FS |
| Cummins 2011       | PS | PS | PS | PS | PS | FS | PS | PS | PS | PS | NA   | PS   | PS | NS   | NS   | PS | PS | FS | NA | FS | PS | NA   | FS   | NA | NS | FS | NS |
| Shi 2020           | FS | FS | FS | FS | FS | NS | FS | NS | NS | PS | FS   | NA   | PS | FS   | NA   | PS | NA | NA | FS | FS | PS | NS   | NA   | FS | PS | NS | NS |
| Beresniak 2013     | FS | FS | FS | PS | PS | FS | PS | FS | NS | PS | NA   | NS   | NA | NA   | FS   | PS | PS | FS | PS | NS | PS | NA   | NS   | NS | PS | FS | NS |
| Gissel 2016        | FS | NS | FS | PS   | NA   | NS | NA   | NS   | FS | PS | FS | FS | FS | FS | NA   | FS   | NS | PS | FS | FS |

| <b>Question No.</b> | <b>1</b> | <b>2</b> | <b>3</b> | <b>4</b> | <b>5</b> | <b>6</b> | <b>7</b> | <b>8</b> | <b>9</b> | <b>10</b> | <b>11 a</b> | <b>11 b</b> | <b>12</b> | <b>13 a</b> | <b>13 b</b> | <b>14</b> | <b>15</b> | <b>16</b> | <b>17</b> | <b>18</b> | <b>19</b> | <b>20 a</b> | <b>20 b</b> | <b>21</b> | <b>22</b> | <b>23</b> | <b>24</b> |
|---------------------|----------|----------|----------|----------|----------|----------|----------|----------|----------|-----------|-------------|-------------|-----------|-------------|-------------|-----------|-----------|-----------|-----------|-----------|-----------|-------------|-------------|-----------|-----------|-----------|-----------|
| <b>Study Detail</b> |          |          |          |          |          |          |          |          |          |           |             |             |           |             |             |           |           |           |           |           |           |             |             |           |           |           |           |
| Milev 2019          | PS       | FS       | FS       | PS       | PS       | FS       | FS       | PS       | NS       | NS        | NA          | PS          | NS        | FS          | NS          | FS        | PS        | FS        | NS        | FS        | NS        | PS          | FS          | FS        | PS        | PS        | FS        |
| Eriksson 2015       | FS       | PS       | FS       | FS        | PS          | NA          | FS        | NS          | NA          | FS        | NA        | NA        | FS        | NS        | FS        | FS          | PS          | NS        | FS        | FS        | FS        |
| Igarashi 2013       | PS       | PS       | FS       | PS       | PS       | NS       | PS       | PS       | NS       | PS        | NA          | FS          | NS        | PS          | NA          | NS        | NA        | NA        | NA        | FS        | PS        | NA          | FS          | NA        | PS        | PS        | NS        |
| Jalal 2016          | FS       | PS       | FS       | NS       | PS       | FS       | PS       | FS       | PS       | PS        | PS          | NA          | PS        | NA          | PS          | FS        | PS        | FS        | PS        | PS        | PS        | NS          | FS          | NS        | PS        | PS        | FS        |
| Udkoff 2017         | FS       | PS       | FS       | PS       | PS       | FS       | FS       | FS       | PS       | FS        | FS          | NA          | PS        | FS          | FS          | FS        | FS        | FS        | FS        | FS        | FS        | NA          | FS          | NS        | PS        | FS        | FS        |
| Huoponen 2019       | FS       | PS       | FS       | FS       | PS       | FS       | PS       | PS       | FS       | PS        | NA          | NS          | PS        | NA          | FS          | FS        | PS        | FS        | PS        | PS        | FS        | NA          | PS          | NA        | FS        | FS        | FS        |
| Tzanetakos 2017     | PS       | FS       | FS       | PS       | PS       | FS       | FS       | FS       | PS       | PS        | PS          | NA          | FS        | NA          | FS          | FS        | PS        | FS        | PS        | PS        | FS        | NA          | PS          | PS        | FS        | FS        | NS        |
| Carlson 2015        | FS       | PS       | PS        | FS          | NA          | PS        | PS          | NS          | PS        | PS        | FS        | NS        | FS        | FS        | PS          | FS          | FS        | PS        | PS        | NS        |
| Schlueter 2019      | FS       | FS       | FS       | PS       | FS       | FS       | FS       | FS       | FS       | FS        | NA          | PS          | FS        | NA          | PS          | FS        | FS        | FS        | NS        | PS        | FS        | NA          | PS          | FS        | FS        | NS        | FS        |
| Fatemi 2020         | FS       | FS       | NS       | FS       | FS       | FS       | PS       | FS       | PS       | FS        | NA          | PS          | FS        | NA          | PS          | PS        | FS        | FS        | NS        | PS        | FS        | NA          | FS          | NS        | FS        | NS        | FS        |
| vandeLaar 2019      | PS       | PS       | FS       | PS       | FS       | FS       | FS       | FS       | FS       | FS        | PS          | NA          | FS        | NA          | NS          | FS        | PS        | FS        | FS        | PS        | FS        | NA          | FS          | NS        | PS        | FS        | NS        |
| Asche 2017          | PS       | PS       | PS       | NS       | PS       | FS       | PS       | NS       | PS       | PS        | NA          | NS          | NA        | NA          | NS          | PS        | NS        | FS        | PS        | NS        | FS        | NA          | FS          | NA        | PS        | FS        | NS        |
| Lekander 2010       | PS       | FS       | FS       | FS       | PS       | FS       | PS       | NS       | FS       | PS        | FS          | NS          | PS        | NS          | NS          | PS        | PS        | FS        | FS        | NS        | FS        | NS          | FS          | NS        | PS        | PS        | NS        |
| Tian 2019           | FS       | FS       | FS       | FS       | FS       | NS       | PS       | NS       | NS       | FS        | PS          | NA          | NA        | FS          | NA          | PS        | NA        | NA        | FS        | FS        | PS        | NS          | NA          | NS        | PS        | FS        | PS        |
| Wu 2015             | FS       | PS       | FS       | NS       | FS       | FS       | PS       | PS       | PS       | PS        | NA          | NS          | PS        | NA          | NS          | PS        | PS        | FS        | PS        | NS        | FS        | NA          | FS          | NS        | PS        | FS        | NS        |
| Incerti 2020        | FS       | FS       | FS       | PS       | FS       | FS       | PS       | PS       | PS       | PS        | PS          | NA          | NS        | NS          | NS          | NS        | PS        | FS        | NA        | NS        | PS        | NA          | NA          | NS        | PS        | PS        | NS        |
| Chen 2019           | FS       | PS       | FS       | PS        | PS          | NA          | NA        | NA          | PS          | PS        | PS        | FS        | NS        | FS        | FS        | NS          | FS          | NS        | PS        | PS        | NS        |
| Athanasakis 2015    | FS       | PS       | FS       | PS       | PS       | FS       | FS       | FS       | FS       | FS        | NA          | FS          | FS        | FS          | NS          | FS        | PS        | FS        | NS        | NS        | FS        | PS          | PS          | NS        | PS        | PS        | FS        |
| Lekander 2013       | PS       | PS       | FS       | FS       | PS       | FS       | PS       | PS       | NS       | PS        | NS          | PS          | NS        | NS          | NS          | NS        | PS        | FS        | FS        | PS        | FS        | NS          | NS          | FS        | PS        | PS        | NS        |
| Núñez 2019          | PS       | PS       | FS       | PS       | PS       | NS       | FS       | NS       | NS       | FS        | NA          | FS          | NS        | FS          | NS          | FS        | NA        | PS        | NS        | FS        | NS        | NS          | PS          | NS        | PS        | PS        | FS        |

| <b>Question No.</b> | <b>1</b> | <b>2</b> | <b>3</b> | <b>4</b> | <b>5</b> | <b>6</b> | <b>7</b> | <b>8</b> | <b>9</b> | <b>10</b> | <b>11 a</b> | <b>11 b</b> | <b>12</b> | <b>13 a</b> | <b>13 b</b> | <b>14</b> | <b>15</b> | <b>16</b> | <b>17</b> | <b>18</b> | <b>19</b> | <b>20 a</b> | <b>20 b</b> | <b>21</b> | <b>22</b> | <b>23</b> | <b>24</b> |
|---------------------|----------|----------|----------|----------|----------|----------|----------|----------|----------|-----------|-------------|-------------|-----------|-------------|-------------|-----------|-----------|-----------|-----------|-----------|-----------|-------------|-------------|-----------|-----------|-----------|-----------|
| <b>Study Detail</b> |          |          |          |          |          |          |          |          |          |           |             |             |           |             |             |           |           |           |           |           |           |             |             |           |           |           |           |
| Armstrong 2018      | PS       | PS       | PS       | PS       | NS       | NS       | PS       | NS       | NS       | PS        | PS          | NA          | NA        | NA          | PS          | PS        | NA        | NA        | NA        | PS        | PS        | NA          | PS          | PS        | PS        | FS        | FS        |
| Alemao 2018         | FS       | PS       | FS       | FS       | PS       | FS       | PS       | FS       | FS       | PS        | NS          | NA          | PS        | NA          | PS          | FS        | PS        | FS        | NA        | PS        | FS        | NA          | PS          | NA        | PS        | PS        | NS        |
| Puolakka 2012       | FS       | FS       | FS       | NS       | PS       | FS       | FS       | FS       | NS       | FS        | NA          | NS          | NA        | NA          | FS          | PS        | FS        | FS        | PS        | PS        | PS        | NA          | NS          | FS        | PS        | FS        | FS        |
| Soini 2012          | FS       | PS       | PS       | FS        | NA          | PS          | PS        | NA          | FS          | FS        | PS        | FS        | NS        | FS        | FS        | NA          | PS          | NS        | PS        | FS        | NS        |
| Bewley 2018         | PS       | PS       | FS       | FS       | FS       | FS       | PS       | FS       | FS       | PS        | NA          | FS          | PS        | NA          | NS          | NS        | FS        | FS        | FS        | FS        | FS        | FS          | FS          | NA        | PS        | PS        | FS        |
| Neubauer 2018       | PS       | PS       | FS       | NS       | PS       | FS       | PS       | PS       | FS       | PS        | NA          | NS          | NA        | NA          | FS          | FS        | PS        | FS        | NA        | PS        | PS        | NA          | NA          | NA        | PS        | NS        | NS        |
| Corbett 2017        | FS       | PS       | PS       | FS        | NA          | FS          | NA        | NA          | FS          | NA        | PS        | FS        | NS        | NS        | FS        | NS          | PS          | PS        | FS        | PS        | NS        |
| Stephens 2015       | PS       | PS       | FS       | PS       | FS       | FS       | FS       | FS       | FS       | FS        | PS          | NA          | NS        | NA          | FS          | FS        | PS        | FS        | FS        | FS        | FS        | NA          | FS          | NS        | PS        | FS        | NS        |
| Lekander 2013       | PS       | PS       | FS       | FS       | PS       | FS       | FS       | FS       | FS       | FS        | NA          | PS          | PS        | NA          | PS          | PS        | PS        | FS        | FS        | PS        | FS        | NA          | FS          | NA        | PS        | FS        | FS        |
| Park 2016           | FS       | FS       | FS       | PS       | FS       | FS       | PS       | PS       | PS       | PS        | PS          | NA          | NA        | NA          | PS          | PS        | PS        | FS        | NS        | FS        | FS        | NS          | PS          | NS        | PS        | PS        | PS        |
| TerWee 2017         | FS        | NA          | NA          | NS        | NS          | NA          | FS        | NA        | FS        | FS        | FS        | FS        | FS          | FS          | NS        | PS        | FS        | NS        |
| Wilson 2018         | FS       | PS       | FS       | PS       | PS       | FS       | PS       | PS       | FS       | PS        | NS          | NA          | PS        | NA          | PS          | PS        | PS        | FS        | NS        | PS        | PS        | NA          | FS          | NS        | PS        | PS        | FS        |
| Kobelt 2014         | PS       | PS       | FS       | FS       | PS       | FS       | PS       | FS       | PS       | NS        | NA          | NS          | PS        | NA          | PS          | FS        | FS        | FS        | PS        | PS        | FS        | NA          | PS          | NS        | PS        | FS        | FS        |
| Yuan 2010           | FS       | PS       | FS       | PS       | PS       | FS       | FS       | PS       | PS       | PS        | NA          | PS          | PS        | NS          | NS          | FS        | PS        | FS        | NS        | NS        | FS        | PS          | PS          | NA        | PS        | PS        | NS        |
| Cárdenas 2016       | FS       | FS       | FS       | FS       | FS       | FS       | PS       | NS       | NS       | PS        | PS          | NA          | NA        | FS          | NA          | PS        | NA        | NA        | FS        | FS        | FS        | NS          | NA          | NS        | PS        | FS        | FS        |
| Wu 2019             | PS       | PS       | FS       | PS       | PS       | FS       | PS       | FS       | PS       | PS        | NS          | PS          | NS        | PS          | NS          | PS        | NS        | PS        | FS        | NS        | PS        | NS          | NS          | NS        | PS        | PS        | NS        |
| Punekar 2010        | PS       | PS       | FS       | NS       | PS       | FS       | PS       | PS       | FS       | PS        | NA          | FS          | PS        | PS          | NS          | NS        | PS        | FS        | FS        | PS        | FS        | PS          | FS          | NS        | PS        | FS        | NS        |
| Wu 2018             | FS       | FS       | FS       | PS       | FS       | FS       | PS       | PS       | PS       | PS        | PS          | NA          | NA        | NA          | PS          | NA        | PS        | FS        | NS        | FS        | PS        | NS          | FS          | NS        | PS        | NS        | PS        |
| Hallinen 2010       | FS       | PS       | FS       | FS        | NA          | PS          | PS        | NA          | FS          | FS        | PS        | FS        | NS        | NS        | FS        | NA          | PS          | NS        | PS        | FS        | PS        |
| Claxton 2018        | PS       | PS       | FS       | FS       | PS       | PS       | FS       | FS       | PS       | FS        | NA          | FS          | FS        | FS          | NS          | FS        | PS        | FS        | FS        | FS        | FS        | PS          | FS          | NS        | PS        | FS        | FS        |
| Hidalgo-Vega 2015   | PS       | FS       | FS       | NS       | FS       | FS       | FS       | FS       | FS       | PS        | NA          | PS          | PS        | FS          | NS          | PS        | PS        | FS        | NA        | FS        | FS        | NA          | FS          | NS        | PS        | FS        | FS        |



| <b>Question No.</b> | <b>1</b> | <b>2</b> | <b>3</b> | <b>4</b> | <b>5</b> | <b>6</b> | <b>7</b> | <b>8</b> | <b>9</b> | <b>10</b> | <b>11 a</b> | <b>11 b</b> | <b>12</b> | <b>13 a</b> | <b>13 b</b> | <b>14</b> | <b>15</b> | <b>16</b> | <b>17</b> | <b>18</b> | <b>19</b> | <b>20 a</b> | <b>20 b</b> | <b>21</b> | <b>22</b> | <b>23</b> | <b>24</b> |    |
|---------------------|----------|----------|----------|----------|----------|----------|----------|----------|----------|-----------|-------------|-------------|-----------|-------------|-------------|-----------|-----------|-----------|-----------|-----------|-----------|-------------|-------------|-----------|-----------|-----------|-----------|----|
| <b>Study Detail</b> |          |          |          |          |          |          |          |          |          |           |             |             |           |             |             |           |           |           |           |           |           |             |             |           |           |           |           |    |
| Stawowczyk 2016     | FS       | PS       | NS       | NS       | FS       | FS       | PS       | FS       | FS       | PS        | NS          | PS          | NS        | NS          | NS          | FS        | PS        | FS        | FS        | FS        | FS        | PS          | FS          | NA        | PS        | NS        | NS        |    |
| Muszbek 2019        | PS       | PS       | NS       | PS       | NS       | FS       | PS       | PS       | PS       | PS        | NA          | PS          | PS        | NS          | NS          | NS        | PS        | FS        | NA        | NS        | FS        | NA          | FS          | NA        | PS        | FS        | NS        |    |
| Rencz 2017          | FS       | FS       | FS       | NS       | PS       | FS       | FS       | PS       | PS       | FS        | NA          | PS          | PS        | PS          | NS          | FS        | PS        | FS        | NS        | FS        | FS        | NA          | FS          | NA        | PS        | FS        | FS        |    |
| Stawowczyk 2016     | FS        | PS          | NA          | FS        | PS          | PS          | FS          | NA          | FS        | FS        | PS        | FS        | FS |
| Schipper 2011       | FS       | FS       | FS       | PS       | FS       | FS       | NS       | PS       | PS       | PS        | NS          | NS          | NA        | NA          | PS          | PS        | PS        | FS        | NS        | NS        | PS        | PS          | NS          | NS        | PS        | PS        | PS        |    |
| Kuster 2016         | PS       | FS       | FS       | PS       | FS       | FS       | FS       | FS       | FS       | FS        | PS          | NA          | NS        | NA          | FS          | FS        | PS        | FS        | FS        | FS        | FS        | FS          | NA          | FS        | FS        | PS        | FS        | FS |
| Diamantopoulos 2014 | FS       | FS       | FS       | PS       | FS       | FS       | PS       | PS       | PS       | PS        | PS          | NA          | NA        | NA          | PS          | NA        | PS        | FS        | NS        | FS        | PS        | NS          | FS          | NS        | PS        | FS        | FS        |    |
| Moradi 2016         | FS       | FS       | FS       | FS       | PS       | NS       | FS       | PS       | PS       | FS        | NA          | PS          | PS        | FS          | NS          | FS        | PS        | FS        | NS        | PS        | FS        | PS          | PS          | NA        | PS        | NS        | NS        |    |
| Armstrong 2016      | FS       | PS       | FS       | PS       | NS       | NS       | FS       | PS       | NS       | PS        | PS          | NA          | NS        | NS          | NS          | PS        | NA        | NA        | FS        | NS        | FS        | PS          | NA          | NS        | PS        | FS        | NS        |    |
| Saito 2013          | FS       | FS       | FS       | FS       | PS       | FS       | FS       | PS       | NS       | FS        | NA          | PS          | PS        | FS          | FS          | FS        | PS        | FS        | NS        | FS        | FS        | NS          | PS          | NA        | PS        | PS        | FS        |    |
| Ung 2014            | FS       | FS       | FS       | FS       | FS       | PS       | FS       | PS       | PS       | FS        | NA          | FS          | PS        | FS          | FS          | FS        | PS        | FS        | NS        | FS        | NS        | PS          | PS          | NA        | PS        | PS        | FS        |    |
| Foley 2018          | FS       | PS       | PS       | PS        | PS          | NA          | NA        | NA          | PS          | PS        | PS        | FS        | NS        | FS        | PS        | PS          | FS          | NS        | PS        | PS        | NS        |    |
| Tang 2012           | FS       | PS       | FS       | FS        | NA          | FS          | PS        | FS          | NS          | FS        | PS        | FS        | FS        | FS        | FS        | PS          | FS          | NA        | PS        | NS        | NS        |    |
| Balak 2020          | PS       | FS       | FS       | PS       | PS       | FS       | PS       | FS       | NS       | FS        | NA          | PS          | NA        | NA          | FS          | PS        | NA        | FS        | NS        | PS        | PS        | NA          | PS          | PS        | PS        | PS        | FS        | FS |
| Goeree 2018         | PS       | PS       | FS       | FS       | PS       | FS       | FS       | FS       | FS       | FS        | NA          | FS          | PS        | FS          | FS          | FS        | FS        | FS        | FS        | FS        | FS        | FS          | NS          | FS        | NS        | PS        | PS        | FS |
| Nguyen 2012         | PS       | PS       | FS       | PS       | PS       | FS       | PS       | FS       | PS       | PS        | FS          | PS          | FS        | NA          | FS          | PS        | PS        | FS        | PS        | PS        | FS        | NS          | PS          | PS        | PS        | PS        | PS        | FS |
| Yang 2016           | PS       | FS       | FS       | PS       | PS       | FS       | PS       | NS       | NS       | FS        | FS          | NA          | NA        | NA          | PS          | PS        | NA        | NA        | FS        | NS        | PS        | NA          | NA          | NS        | PS        | NS        | FS        |    |
| Betts 2016          | FS       | PS       | FS       | PS       | NS       | NS       | FS       | NS       | NS       | FS        | PS          | NA          | NS        | NS          | NA          | FS        | NA        | NA        | NS        | NS        | FS        | PS          | PS          | NS        | PS        | FS        | FS        |    |
| Quartuccio 2015     | FS       | FS       | FS       | PS       | FS       | FS       | FS       | PS       | PS       | PS        | PS          | NA          | NA        | NA          | PS          | PS        | PS        | PS        | PS        | NS        | PS        | NS          | FS          | NS        | PS        | NS        | NS        |    |
| Bolin 2019          | PS       | PS       | FS       | NS       | PS       | NS       | FS       | PS       | FS       | FS        | NA          | PS          | NS        | FS          | FS          | PS        | PS        | FS        | NS        | FS        | FS        | PS          | PS          | NA        | PS        | FS        | FS        |    |
| Kanters 2018        | FS       | FS       | FS       | PS       | FS       | FS       | FS       | FS       | FS       | FS        | PS          | NA          | PS        | PS          | PS          | PS        | PS        | NS        | FS        | PS        | FS        | NA          | FS          | NS        | PS        | FS        | NS        |    |

| <b>Question No.</b>  | <b>1</b> | <b>2</b> | <b>3</b> | <b>4</b> | <b>5</b> | <b>6</b> | <b>7</b> | <b>8</b> | <b>9</b> | <b>10</b> | <b>11 a</b> | <b>11 b</b> | <b>12</b> | <b>13 a</b> | <b>13 b</b> | <b>14</b> | <b>15</b> | <b>16</b> | <b>17</b> | <b>18</b> | <b>19</b> | <b>20 a</b> | <b>20 b</b> | <b>21</b> | <b>22</b> | <b>23</b> | <b>24</b> |
|----------------------|----------|----------|----------|----------|----------|----------|----------|----------|----------|-----------|-------------|-------------|-----------|-------------|-------------|-----------|-----------|-----------|-----------|-----------|-----------|-------------|-------------|-----------|-----------|-----------|-----------|
| <b>Study Detail</b>  |          |          |          |          |          |          |          |          |          |           |             |             |           |             |             |           |           |           |           |           |           |             |             |           |           |           |           |
| Borse 2018           | PS       | FS       | NS       | FS        | NA          | FS          | PS        | PS          | NS          | FS        | FS        | FS        | FS        | NS        | FS        | NA          | FS          | NA        | FS        | FS        | NS        |
| Stem 2017            | PS       | PS       | FS       | NS       | FS       | FS       | FS       | FS       | FS       | PS        | NA          | PS          | PS        | NS          | NS          | NS        | PS        | FS        | NA        | FS        | FS        | PS          | FS          | NA        | PS        | FS        | NS        |
| Cimmino 2011         | FS       | FS       | FS       | NS       | PS       | FS       | FS       | PS       | NS       | FS        | NA          | FS          | NA        | NA          | FS          | PS        | FS        | FS        | PS        | FS        | PS        | NA          | NS          | NA        | PS        | FS        | NS        |
| Baji 2018            | FS       | FS       | FS       | NS       | PS       | FS       | FS       | PS       | PS       | FS        | NA          | PS          | NS        | PS          | NS          | FS        | PS        | FS        | NS        | FS        | FS        | NA          | FS          | NA        | PS        | FS        | FS        |
| Stawowczyk 2016      | FS       | FS       | FS       | PS       | FS       | FS       | FS       | FS       | FS       | FS        | PS          | NA          | FS        | NA          | NS          | FS        | PS        | FS        | FS        | FS        | FS        | NA          | FS          | FS        | PS        | FS        | NS        |
| Whittingtone 2019    | FS       | FS       | FS       | PS       | FS       | FS       | PS       | PS       | PS       | PS        | NS          | NS          | NA        | NA          | FS          | PS        | PS        | FS        | NS        | FS        | FS        | NS          | PS          | NS        | PS        | PS        | NS        |
| Feldman 2017         | PS       | PS       | FS       | FS       | PS       | NS       | PS       | PS       | NS       | PS        | NA          | PS          | NS        | NS          | NA          | PS        | NA        | NA        | PS        | NS        | PS        | NS          | NA          | NS        | PS        | FS        | FS        |
| Trigo-Vicente 2018   | FS       | FS       | FS       | NS       | PS       | FS       | FS       | PS       | PS       | PS        | PS          | NA          | NA        | NA          | PS          | NA        | PS        | PS        | NS        | NS        | PS        | PS          | FS          | NS        | PS        | NS        | PS        |
| Chaudhary 2013       | FS       | FS       | FS       | PS       | PS       | FS       | PS       | PS       | PS       | PS        | PS          | NA          | NA        | NA          | PS          | NA        | PS        | FS        | NS        | FS        | PS        | PS          | FS          | NS        | PS        | PS        | PS        |
| Goeree 2019          | PS       | FS       | FS       | PS       | PS       | FS       | FS       | PS       | FS       | FS        | NA          | FS          | PS        | FS          | NS          | FS        | FS        | PS        | FS        | FS        | FS        | PS          | FS          | FS        | PS        | PS        | FS        |
| Wu 2020              | FS       | PS       | FS       | PS       | NS       | NS       | FS       | PS       | NS       | PS        | NA          | NS          | NA        | NA          | NS          | PS        | NA        | FS        | PS        | NA        | FS        | NA          | FS          | NS        | PS        | FS        | NS        |
| Scott 2020           | PS       | PS       | FS       | PS       | FS       | FS       | PS       | PS       | NS       | PS        | NA          | PS          | NS        | PS          | NS          | FS        | FS        | FS        | NS        | FS        | FS        | NA          | FS          | NS        | FS        | FS        | FS        |
| Purmonen 2019        | FS       | FS       | FS       | PS       | PS       | FS       | FS       | FS       | PS       | FS        | NA          | FS          | PS        | FS          | NS          | FS        | FS        | PS        | NS        | FS        | FS        | PS          | FS          | NA        | PS        | FS        | FS        |
| Liu 2012             | PS       | PS       | FS       | NS       | PS       | NS       | NS       | PS       | NS       | PS        | FS          | PS          | NS        | NS          | NS          | NS        | PS        | NS        | NS        | NS        | PS        | NA          | NA          | NS        | PS        | FS        | FS        |
| Hernandez 2020       | FS       | FS       | FS       | PS       | PS       | FS       | FS       | FS       | FS       | PS        | FS          | NA          | PS        | NA          | FS          | FS        | PS        | FS        | PS        | NS        | FS        | NA          | FS          | NA        | FS        | FS        | FS        |
| Diamantopoulos 2012  | FS       | FS       | FS       | PS       | FS       | FS       | FS       | PS       | PS       | PS        | PS          | NA          | NA        | NA          | PS          | NA        | PS        | FS        | NS        | FS        | PS        | NS          | PS          | NS        | PS        | FS        | NS        |
| Hansson-Hedblom 2018 | PS       | FS       | FS       | FS       | PS       | FS       | FS       | PS       | FS       | PS        | FS          | NA          | PS        | NA          | FS          | FS        | PS        | FS        | PS        | PS        | FS        | NA          | PS          | PS        | FS        | PS        | FS        |
| Beilman 2016         | FS       | FS       | FS       | PS       | FS       | NS       | FS       | PS       | PS       | PS        | NS          | NS          | NS        | NS          | PS          | PS        | PS        | FS        | NS        | NS        | FS        | NA          | FS          | NS        | PS        | FS        | FS        |

| <b>Question No.</b> | <b>1</b> | <b>2</b> | <b>3</b> | <b>4</b> | <b>5</b> | <b>6</b> | <b>7</b> | <b>8</b> | <b>9</b> | <b>10</b> | <b>11 a</b> | <b>11 b</b> | <b>12</b> | <b>13 a</b> | <b>13 b</b> | <b>14</b> | <b>15</b> | <b>16</b> | <b>17</b> | <b>18</b> | <b>19</b> | <b>20 a</b> | <b>20 b</b> | <b>21</b> | <b>22</b> | <b>23</b> | <b>24</b> |
|---------------------|----------|----------|----------|----------|----------|----------|----------|----------|----------|-----------|-------------|-------------|-----------|-------------|-------------|-----------|-----------|-----------|-----------|-----------|-----------|-------------|-------------|-----------|-----------|-----------|-----------|
| <b>Study Detail</b> |          |          |          |          |          |          |          |          |          |           |             |             |           |             |             |           |           |           |           |           |           |             |             |           |           |           |           |
| Marchetti 2013      | FS       | PS       | PS       | PS       | FS       | FS       | PS       | PS       | FS       | FS        | NA          | NS          | PS        | NS          | NS          | NS        | PS        | FS        | PS        | PS        | FS        | NA          | FS          | NS        | FS        | NS        | FS        |
| Augustin 2020       | FS       | PS       | FS       | PS       | PS       | NS       | FS       | PS       | NS       | FS        | NA          | FS          | NA        | NA          | FS          | FS        | PS        | NS        | NS        | FS        | PS        | NA          | PS          | NS        | PS        | FS        | FS        |
| Gherardi 2018       | PS       | FS        | NA          | FS          | PS        | FS          | PS          | FS        | FS        | FS        | FS        | FS        | FS        | NA          | FS          | NS        | PS        | FS        | FS        |
| Petryszyn 2020      | FS       | FS       | FS       | PS       | FS       | FS       | FS       | PS       | PS       | PS        | PS          | NA          | NA        | NA          | PS          | NA        | PS        | FS        | NS        | FS        | PS        | PS          | PS          | NS        | PS        | NS        | PS        |
| Saraux 2020         | PS       | PS       | FS       | PS       | PS       | FS       | FS       | FS       | NS       | FS        | NA          | PS          | NS        | NS          | NS          | PS        | PS        | FS        | FS        | NS        | NS        | PS          | PS          | NS        | PS        | FS        | FS        |
| Phisalprapa 2020    | FS       | FS       | FS       | PS       | PS       | FS       | FS       | NS       | PS       | PS        | PS          | NA          | NA        | NA          | PS          | NA        | PS        | FS        | NS        | FS        | PS        | PS          | FS          | NS        | PS        | PS        | PS        |
| Doherty 2012        | PS       | PS       | FS       | NS       | FS       | FS       | FS       | FS       | FS       | FS        | NA          | PS          | FS        | NA          | FS          | FS        | FS        | FS        | PS        | FS        | FS        | NA          | PS          | NS        | PS        | NS        | FS        |
| Chi 2014            | PS       | PS       | FS       | NS       | NS       | NS       | PS       | NS       | NS       | PS        | FS          | NA          | NS        | NA          | PS          | PS        | PS        | FS        | FS        | NS        | PS        | NA          | NS          | NS        | FS        | NS        | FS        |
| Sawah 2017          | PS       | PS       | FS       | PS       | PS       | NS       | FS       | NS       | NS       | FS        | NA          | FS          | NS        | NS          | NS          | FS        | NA        | PS        | FS        | NS        | NS        | PS          | NS          | FS        | PS        | PS        | FS        |
| Martin 2011         | FS       | PS       | FS       | NS       | PS       | NS       | PS       | FS       | PS       | PS        | NA          | FS          | NS        | NS          | NA          | PS        | NS        | NA        | NA        | NS        | PS        | NS          | FS          | NS        | PS        | FS        | FS        |
| Feldman 2018        | FS       | PS       | FS       | PS       | PS       | FS       | PS       | NS       | PS       | PS        | PS          | NA          | NS        | NS          | NS          | NS        | NS        | NS        | FS        | PS        | FS        | FS          | PS          | NS        | PS        | FS        | NS        |
| Duveltop 2019       | FS       | PS       | FS       | PS       | PS       | FS       | FS       | PS       | FS       | FS        | PS          | NA          | PS        | FS          | NS          | FS        | PS        | FS        | FS        | FS        | FS        | PS          | FS          | NS        | PS        | FS        | NS        |
| Shaffer 2020        | FS       | FS       | FS       | PS       | FS       | NS       | FS       | PS       | PS       | PS        | PS          | NA          | NA        | NA          | PS          | NA        | PS        | NS        | NS        | PS        | PS        | NS          | PS          | NS        | PS        | NS        | FS        |
| Wu 2012             | PS       | PS       | FS       | PS       | PS       | FS       | FS       | PS       | PS       | FS        | NA          | PS          | FS        | FS          | NS          | PS        | PS        | FS        | FS        | FS        | FS        | PS          | FS          | NS        | PS        | FS        | FS        |
| Ansari pour 2017    | FS       | FS       | FS       | PS       | FS       | FS       | FS       | PS       | NS       | PS        | PS          | NA          | NA        | NA          | PS          | PS        | PS        | FS        | NS        | FS        | FS        | NS          | FS          | NS        | PS        | FS        | FS        |
| Saeki 2020          | PS       | PS       | FS       | PS       | PS       | FS       | FS       | FS       | PS       | PS        | NA          | NS          | FS        | NA          | FS          | FS        | FS        | FS        | PS        | PS        | PS        | NA          | FS          | NS        | PS        | FS        | FS        |
| Neilson 2010        | PS       | FS       | FS       | FS       | FS       | FS       | PS       | PS       | FS       | FS        | NA          | NA          | PS        | NA          | FS          | FS        | PS        | FS        | PS        | FS        | FS        | NA          | FS          | NS        | FS        | FS        | NS        |
| Fournier 2019       | FS       | PS       | PS       | PS       | PS       | FS       | PS       | PS       | PS       | PS        | NA          | NS          | NS        | NA          | PS          | PS        | NS        | FS        | PS        | NS        | FS        | NA          | FS          | NS        | PS        | FS        | FS        |
| Holko 2018          | FS       | FS       | FS       | PS       | FS       | FS       | FS       | FS       | FS       | FS        | PS          | NA          | PS        | NA          | PS          | FS        | PS        | FS        | FS        | FS        | FS        | NA          | FS          | FS        | PS        | FS        | FS        |
| Wang 2014           | PS       | PS       | FS       | PS       | FS       | FS       | NS       | PS       | NS       | PS        | FS          | NA          | NS        | NS          | NA          | NS        | NA        | NA        | NA        | NS        | PS        | NA          | NA          | NS        | PS        | NS        | FS        |

| <b>Question No.</b> | <b>1</b> | <b>2</b> | <b>3</b> | <b>4</b> | <b>5</b> | <b>6</b> | <b>7</b> | <b>8</b> | <b>9</b> | <b>10</b> | <b>11 a</b> | <b>11 b</b> | <b>12</b> | <b>13 a</b> | <b>13 b</b> | <b>14</b> | <b>15</b> | <b>16</b> | <b>17</b> | <b>18</b> | <b>19</b> | <b>20 a</b> | <b>20 b</b> | <b>21</b> | <b>22</b> | <b>23</b> | <b>24</b> |
|---------------------|----------|----------|----------|----------|----------|----------|----------|----------|----------|-----------|-------------|-------------|-----------|-------------|-------------|-----------|-----------|-----------|-----------|-----------|-----------|-------------|-------------|-----------|-----------|-----------|-----------|
| <b>Study Detail</b> |          |          |          |          |          |          |          |          |          |           |             |             |           |             |             |           |           |           |           |           |           |             |             |           |           |           |           |
| Cummins 2012        | FS       | FS       | FS       | PS       | PS       | FS       | PS       | PS       | PS       | PS        | PS          | NA          | NA        | NA          | PS          | NA        | PS        | FS        | NS        | FS        | PS        | PS          | FS          | NS        | PS        | FS        | FS        |
| deJong 2016         | FS       | PS       | FS       | FS       | FS       | FS       | FS       | FS       | NS       | FS        | NA          | NA          | NS        | PS          | NA          | FS        | NA        | FS        | NS        | FS        | FS        | FS          | NS          | NS        | PS        | FS        | FS        |
| Brown 2018          | PS       | FS       | FS       | PS       | FS       | FS       | FS       | PS       | NA       | FS        | FS          | FS          | FS        | FS          | NA          | FS        | NA        | NA        | FS        | FS        | FS        | FS          | PS          | NA        | FS        | FS        | NS        |
| Buchanan 2018       | PS       | PS       | FS       | FS       | PS       | FS       | FS       | FS       | FS       | FS        | FS          | NA          | PS        | FS          | NS          | FS        | PS        | FS        | FS        | FS        | FS        | PS          | FS          | FS        | PS        | PS        | FS        |
| Panaccione 2020     | PS       | FS       | FS       | FS       | FS       | FS       | FS       | PS       | NS       | FS        | FS          | NA          | PS        | NA          | FS          | FS        | FS        | NS        | FS        | FS        | FS        | NA          | FS          | NS        | FS        | FS        | FS        |
| Yokomizo 2016       | FS       | PS       | FS       | PS       | PS       | FS       | PS       | FS       | NS       | PS        | NS          | NA          | NS        | NA          | PS          | PS        | PS        | FS        | PS        | PS        | PS        | NA          | PS          | NS        | PS        | PS        | NS        |
| Aliyev 2019         | FS        | PS          | NA          | FS        | NA          | FS          | FS        | PS        | FS        | FS        | PS        | FS        | NA          | FS          | NS        | PS        | FS        | NS        |
| Blackhouse 2012     | FS       | PS       | FS       | PS       | PS       | FS       | FS       | PS       | PS       | PS        | NA          | FS          | PS        | FS          | FS          | PS        | PS        | FS        | NS        | FS        | FS        | PS          | PS          | NS        | PS        | NS        | FS        |
| Emery 2018          | PS       | FS       | FS       | PS       | PS       | FS       | FS       | FS       | FS       | FS        | NA          | FS          | NS        | FS          | NS          | FS        | PS        | PS        | NS        | FS        | FS        | PS          | FS          | FS        | FS        | FS        | FS        |
| Wilson 2017         | FS       | FS       | FS       | PS       | FS       | FS       | PS       | PS       | PS       | PS        | PS          | NA          | NA        | NA          | PS          | NA        | PS        | FS        | NS        | FS        | PS        | NS          | FS          | NS        | PS        | FS        | PS        |
| Villacorta 2013     | FS       | FS       | FS       | PS       | PS       | FS       | FS       | PS       | PS       | PS        | NA          | PS          | FS        | FS          | NA          | PS        | PS        | FS        | NS        | FS        | FS        | NS          | FS          | NS        | PS        | PS        | FS        |
| Saini 2012          | PS       | PS       | FS       | PS       | PS       | FS       | FS       | FS       | FS       | FS        | NA          | NS          | PS        | NA          | PS          | PS        | PS        | FS        | FS        | NS        | FS        | NA          | FS          | NS        | PS        | FS        | FS        |
| Bojke 2011          | PS       | PS       | FS       | PS       | NS       | FS       | FS       | PS       | PS       | PS        | PS          | PS          | PS        | NS          | NS          | PS        | PS        | FS        | PS        | PS        | PS        | PS          | PS          | NS        | PS        | PS        | NS        |
| Hyde 2018           | PS       | PS       | FS       | NS       | NS       | NS       | FS       | FS       | NS       | PS        | NA          | NS          | NA        | NA          | NS          | PS        | NA        | NA        | NS        | NS        | FS        | NA          | NA          | NS        | FS        | FS        | FS        |
| Trigo-Vicente 2020  | FS       | FS       | FS       | NS       | PS       | FS       | PS       | PS       | PS       | PS        | PS          | NA          | NA        | NA          | PS          | NA        | PS        | PS        | NS        | NS        | PS        | PS          | FS          | NS        | PS        | NS        | NS        |
| Dos Santos 2020     | FS       | PS       | FS       | FS       | PS       | FS       | FS       | FS       | FS       | NS        | NA          | PS          | PS        | NS          | PS          | PS        | PS        | FS        | FS        | PS        | FS        | NA          | PS          | NA        | FS        | PS        | FS        |
| Vellopoulou 2020    | FS       | FS       | FS       | NS       | FS       | FS       | FS       | PS       | FS       | PS        | PS          | NA          | NA        | NA          | PS          | NA        | PS        | FS        | NS        | FS        | FS        | NS          | FS          | NS        | PS        | PS        | FS        |
| Teeple 2019         | FS       | PS       | FS       | PS       | PS       | NS       | PS       | PS       | NS       | PS        | NA          | FS          | NS        | PS          | NA          | PS        | NA        | NA        | NA        | NS        | PS        | NA          | NA          | NS        | PS        | FS        | NS        |
| Kowalik 2018        | PS       | PS       | FS       | PS       | FS       | FS       | FS       | NS       | NS       | PS        | PS          | NA          | FS        | NS          | NA          | FS        | NA        | NA        | NS        | NS        | FS        | PS          | NS          | NS        | NS        | NS        | FS        |
| Lohan 2019          | FS       | FS       | FS       | PS       | PS       | FS       | FS       | PS       | PS       | FS        | NA          | FS          | NS        | FS          | NS          | PS        | PS        | PS        | NS        | FS        | FS        | PS          | FS          | FS        | PS        | FS        | FS        |

| <b>Question No.</b> | <b>1</b> | <b>2</b> | <b>3</b> | <b>4</b> | <b>5</b> | <b>6</b> | <b>7</b> | <b>8</b> | <b>9</b> | <b>10</b> | <b>11 a</b> | <b>11 b</b> | <b>12</b> | <b>13 a</b> | <b>13 b</b> | <b>14</b> | <b>15</b> | <b>16</b> | <b>17</b> | <b>18</b> | <b>19</b> | <b>20 a</b> | <b>20 b</b> | <b>21</b> | <b>22</b> | <b>23</b> | <b>24</b> |    |
|---------------------|----------|----------|----------|----------|----------|----------|----------|----------|----------|-----------|-------------|-------------|-----------|-------------|-------------|-----------|-----------|-----------|-----------|-----------|-----------|-------------|-------------|-----------|-----------|-----------|-----------|----|
| <b>Study Detail</b> |          |          |          |          |          |          |          |          |          |           |             |             |           |             |             |           |           |           |           |           |           |             |             |           |           |           |           |    |
| Tian 2020           | PS       | PS       | FS       | PS       | PS       | FS       | FS       | PS       | FS       | FS        | NA          | PS          | FS        | FS          | NS          | FS        | PS        | FS        | NS        | FS        | FS        | PS          | FS          | FS        | PS        | FS        | FS        |    |
| Portu 2010          | PS       | PS       | FS       | PS       | PS       | FS       | PS       | NS       | NS       | PS        | PS          | NA          | NA        | NA          | PS          | PS        | NA        | NA        | NA        | PS        | PS        | NA          | PS          | NA        | FS        | NS        | PS        |    |
| Mulligen 2020       | PS       | PS       | FS        | FS          | NA          | PS        | FS          | NA          | PS        | NA        | NA        | FS        | FS        | FS        | FS          | NA          | NS        | FS        | FS        | PS        |    |
| Jia 2020            | PS       | PS       | FS       | NS       | PS       | FS       | PS       | FS       | NS       | PS        | NA          | PS          | PS        | NS          | NS          | NS        | PS        | FS        | NA        | NS        | PS        | PS          | FS          | NA        | PS        | PS        | NS        |    |
| Verhoeven 2020      | PS       | PS       | FS       | PS       | PS       | FS       | FS       | PS       | FS       | FS        | PS          | NA          | FL        | NS          | NS          | FS        | NA        | NA        | FS        | NS        | FS        | FS          | PS          | NS        | FS        | PS        | FS        |    |
| Malotki 2011        | PS       | PS       | FS       | PS       | PS       | FS       | PS       | NS       | PS       | PS        | NA          | NS          | PS        | NA          | NS          | PS        | NS        | FS        | PS        | NS        | FS        | NA          | FS          | NS        | PS        | FS        | NS        |    |
| Gandjour 2019       | FS       | PS       | FS        | NA          | FS          | FS        | FS          | FS          | FS        | PS        | FS        | FS        | FS        | FS        | FS          | PS          | FS        | FS        | PS        | FS        |    |
| Schweikert 2020     | FS       | FS       | FS       | PS       | PS       | FS       | FS       | PS       | PS       | PS        | NA          | FS          | PS        | NA          | PS          | FS        | PS        | FS        | NS        | NS        | FS        | NS          | FS          | NS        | PS        | PS        | FS        |    |
| Hendrix 2018        | FS       | FS       | FS       | NS       | PS       | FS       | FS       | FS       | PS       | FS        | NA          | FS          | PS        | FS          | FS          | FS        | FS        | FS        | NS        | FS        | FS        | PS          | FS          | NA        | PS        | FS        | FS        |    |
| Dretzke 2011        | FS       | FS       | FS       | NS       | FS       | FS       | FS       | FS       | FS       | FS        | NA          | FS          | FS        | FS          | FS          | FS        | FS        | FS        | FS        | FS        | FS        | PS          | PS          | NA        | FS        | FS        | FS        |    |
| Johansson 2018      | FS       | PS       | FS       | PS       | PS       | FS       | FS       | PS       | FS       | FS        | NA          | FS          | PS        | FS          | NS          | FS        | PS        | FS        | FS        | FS        | FS        | PS          | FS          | NS        | PS        | PS        | FS        |    |
| Igarashi 2019       | FS       | FS       | FS       | PS       | PS       | FS       | FS       | FS       | FS       | FS        | NA          | FS          | FS        | FS          | NS          | PS        | PS        | FS        | NS        | FS        | FS        | PS          | FS          | NS        | PS        | FS        | NS        |    |
| Specchia 2014       | PS       | PS       | FS       | PS       | PS       | FS       | FS       | PS       | PS       | FS        | NA          | FS          | FS        | NA          | PS          | FS        | PS        | NS        | NS        | NS        | FS        | PS          | PS          | NS        | PS        | PS        | FS        |    |
| Tran-Duy 2011       | PS       | PS       | FS       | FS       | PS       | FS       | PS       | FS       | FS       | FS        | NA          | PS          | PS        | NA          | PS          | FS        | PS        | FS        | FS        | FS        | FS        | FS          | NA          | FS        | NS        | PS        | FS        |    |
| Teepel 2020         | PS       | PS       | FS       | FS       | PS       | NS       | FS       | NS       | NS       | FS        | PS          | NA          | NS        | FS          | NS          | FS        | NA        | FS        | FS        | NS        | NS        | NS          | PS          | NS        | PS        | FS        | FS        |    |
| Wu 2018             | PS       | PS       | PS       | NS       | PS       | FS       | PS       | NS       | PS       | PS        | NS          | NS          | NA        | NA          | NS          | PS        | NS        | NA        | PS        | NS        | PS        | NS          | FS          | NS        | PS        | FS        | NS        |    |
| Pan 2011            | FS       | FS       | PS       | PS       | FS       | FS       | PS       | FS       | PS       | PS        | PS          | NA          | NA        | NA          | PS          | PS        | PS        | FS        | NS        | FS        | PS        | NS          | PS          | NS        | PS        | PS        | NS        |    |
| Xia 2018            | FS       | PS       | FS       | PS       | FS       | NS       | FS       | NS       | NS       | FS        | PS          | NA          | NS        | FS          | NA          | FS        | NA        | NA        | FS        | NS        | NS        | PS          | NS          | NS        | FS        | PS        | NS        |    |
| Corbett 2016        | PS       | FS       | FS       | PS       | PS       | FS       | FS       | FS       | PS       | FS        | NA          | FS          | PS        | FS          | NS          | FS        | FS        | FS        | FS        | NS        | FS        | PS          | PS          | PS        | PS        | PS        | FS        | FS |
| Barbieri 2019       | FS       | PS       | FS       | PS       | PS       | FS       | PS       | FS       | FS       | PS        | NA          | PS          | PS        | NA          | NS          | NS        | PS        | FS        | FS        | NS        | PS        | PS          | PS          | NS        | PS        | FS        | FS        |    |
| Luciano 2014        | PS       | PS       | FS       | FS       | FS       | FS       | FS       | FS       | NA       | FS        | NA          | NA          | PS        | NA          | NA          | PS        | NA        | NA        | FS        | FS        | FS        | NA          | NA          | NA        | PS        | FS        | FS        |    |
| Luciano 2017        | PS       | FS       | NA       | FS        | NA          | NA          | PS        | NA          | NA          | FS        | NA        | NA        | FS        | FS        | FS        | NA          | NA          | NA        | PS        | FS        | FS        |    |

| <b>Question No.</b> | <b>1</b> | <b>2</b> | <b>3</b> | <b>4</b> | <b>5</b> | <b>6</b> | <b>7</b> | <b>8</b> | <b>9</b> | <b>10</b> | <b>11 a</b> | <b>11 b</b> | <b>12</b> | <b>13 a</b> | <b>13 b</b> | <b>14</b> | <b>15</b> | <b>16</b> | <b>17</b> | <b>18</b> | <b>19</b> | <b>20 a</b> | <b>20 b</b> | <b>21</b> | <b>22</b> | <b>23</b> | <b>24</b> |    |
|---------------------|----------|----------|----------|----------|----------|----------|----------|----------|----------|-----------|-------------|-------------|-----------|-------------|-------------|-----------|-----------|-----------|-----------|-----------|-----------|-------------|-------------|-----------|-----------|-----------|-----------|----|
| <b>Study Detail</b> |          |          |          |          |          |          |          |          |          |           |             |             |           |             |             |           |           |           |           |           |           |             |             |           |           |           |           |    |
| Lloyd 2012          | PS       | PS       | FS       | PS       | PS       | FS       | FS       | FS       | NS       | FS        | NA          | PS          | PS        | NA          | PS          | PS        | PS        | FS        | FS        | FS        | FS        | NS          | FS          | FS        | PS        | FS        | NS        |    |
| Omelas 2012         | PS       | PS       | FS       | PS       | PS       | FS       | FS       | FS       | FS       | FS        | NA          | PS          | PS        | NA          | PS          | FS        | PS        | PS        | FS        | FS        | FS        | NS          | FS          | PS        | PS        | FS        | FS        |    |
| Omelas 2012         | PS       | FS       | FS       | PS       | PS       | FS       | FS       | FS       | FS       | FS        | NA          | PS          | PS        | NA          | PS          | PS        | PS        | FS        | FS        | FS        | FS        | NA          | FS          | PS        | PS        | FS        | NS        |    |
| Purmonen 2018       | FS       | FS       | FS       | FS       | PS       | FS       | FS       | PS       | PS       | FS        | NA          | FS          | FS        | FS          | FS          | FS        | FS        | FS        | FS        | NS        | FS        | NA          | FS          | NS        | PS        | FS        | FS        |    |
| Tran-Duy 2015       | FS       | PS       | FS       | PS       | FS       | FS       | FS       | PS       | FS       | FS        | PS          | NA          | FS        | NA          | NS          | FS        | PS        | FS        | FS        | PS        | FS        | NA          | FS          | FS        | PS        | FS        | FS        |    |
| Fautrel 2010        | FS       | NS       | FS        | NA          | NA          | NS        | PS          | NA          | FS        | NA        | NS        | NS        | FS        | FS        | NS          | NS          | NS        | PS        | FS        | NS        |    |
| Connolly 2014       | FS       | FS       | FS       | NS       | PS       | FS       | FS       | PS       | FS       | FS        | NA          | PS          | PS        | NA          | FS          | FS        | PS        | NS        | NS        | NS        | NS        | FS          | NA          | NS        | NA        | PS        | PS        | NS |
| Saro 2015           | PS       | PS       | PS       | FS       | PS       | FS       | PS       | PS       | NS       | PS        | PS          | NA          | NA        | FS          | NA          | FS        | NA        | NA        | FS        | NS        | FS        | PS          | NA          | FS        | PS        | FS        | FS        |    |
| Archer 2016         | FS       | FS       | FS       | PS       | FS       | FS       | PS       | FS       | PS       | FS        | NA          | FS          | FS        | FS          | NS          | FS        | PS        | FS        | FS        | NS        | FS        | PS          | PS          | FS        | FS        | FS        | FS        |    |
| Klijn 2018          | FS       | FS       | PS       | FS       | FS       | FS       | PS       | FS       | NS       | PS        | FS          | FS          | PS        | NS          | PS          | FS        | PS        | PS        | NS        | NS        | PS        | NS          | NS          | NS        | PS        | PS        | FS        |    |
| Anis 2011           | PS       | PS       | NS       | NS       | PS       | NS       | PS       | NS       | NS       | PS        | NA          | NS          | PS        | NS          | NS          | PS        | PS        | FS        | NS        | NS        | PS        | NS          | PS          | NS        | PS        | PS        | FS        |    |
| Ferrandiz 2012      | FS       | FS       | FS       | PS       | FS       | FS       | FS       | PS       | NS       | PS        | NA          | PS          | NA        | NA          | PS          | PS        | NS        | FS        | PS        | NS        | FS        | NA          | FS          | NS        | PS        | FS        | FS        |    |
| Capri 2019          | FS       | PS       | FS       | PS       | PS       | FS       | PS       | FS       | FS       | PS        | NS          | NA          | PS        | NS          | NS          | NS        | PS        | FS        | FS        | PS        | FS        | PS          | FS          | NS        | PS        | FS        | FS        |    |
| Ueno 2020           | NS       | PS       | FS       | NS       | PS       | NS       | FS       | PS       | NS       | FS        | NA          | FS          | NA        | NA          | FS          | FS        | NA        | NA        | NS        | FS        | FS        | NA          | NA          | NS        | FS        | FS        | FS        |    |
| Takahashi 2017      | FS       | PS       | FS       | PS       | FS       | NS       | FS       | NS       | NS       | FS        | NS          | NA          | NA        | PS          | NA          | PS        | NA        | NA        | NA        | NS        | NS        | NA          | NS          | NA        | PS        | NS        | FS        |    |
| Park 2020           | FS       | PS       | FS       | NS       | PS       | FS       | PS       | PS       | NS       | PS        | PS          | NA          | NA        | NA          | PS          | FS        | PS        | FS        | NA        | PS        | FS        | NA          | PS          | NA        | PS        | PS        | FS        |    |
| Sawyer 2015         | PS       | PS       | FS       | PS       | PS       | FS       | FS       | FS       | FS       | FS        | NA          | FS          | PS        | NA          | PS          | FS        | PS        | FS        | FS        | FS        | FS        | NA          | FS          | NA        | PS        | FS        | NS        |    |
| Ahn 2013            | PS       | PS       | PS       | PS       | PS       | FS       | PS       | PS       | NS       | PS        | FS          | PS          | NS        | NS          | FS          | PS        | PS        | FS        | NS        | NS        | PS        | NS          | FS          | NS        | PS        | NS        | FS        |    |
| Ghabri 2020         | PS       | PS       | FS       | PS       | FS       | FS       | FS       | FS       | PS       | FS        | NA          | FS          | FS        | NS          | FS          | FS        | PS        | NS        | NS        | NS        | NS        | PS          | PS          | NS        | NS        | PS        | NS        |    |
| Imafuku 2018        | NS       | PS       | FS       | PS       | PS       | NS       | FS       | NS       | NS       | FS        | NA          | FS          | NS        | FS          | NS          | FS        | NA        | PS        | NS        | NS        | NS        | NS          | NS          | NS        | NS        | PS        | FS        | FS |
| Benucci 2011        | FS       | FS       | FS       | PS       | PS       | NS       | NS       | NS       | NS       | PS        | NS          | NS          | NS        | NS          | NS          | NS        | NS        | FS        | NS        | NS        | FS        | NS          | NS          | NS        | PS        | NS        | NS        |    |
| Connolly 2012       | PS       | PS       | FS       | PS       | PS       | FS       | FS       | PS       | PS       | FS        | PS          | NS          | NS        | NS          | PS          | PS        | PS        | NS        | PS        | FS        | PS        | PS          | FS          | NS        | PS        | PS        | FS        |    |

| Question No.          | 1  | 2  | 3  | 4  | 5  | 6  | 7  | 8  | 9  | 10 | 11 a | 11 b | 12 | 13 a | 13 b | 14 | 15 | 16 | 17 | 18 | 19 | 20 a | 20 b | 21 | 22 | 23 | 24 |
|-----------------------|----|----|----|----|----|----|----|----|----|----|------|------|----|------|------|----|----|----|----|----|----|------|------|----|----|----|----|
| Study Detail          |    |    |    |    |    |    |    |    |    |    |      |      |    |      |      |    |    |    |    |    |    |      |      |    |    |    |    |
| Tanaka 2015           | FS | PS | PS | PS | FS | FS | FS | PS | PS | FS | FS   | NA   | PS | FS   | NS   | FS | PS | FS | NS | FS | FS | PS   | PS   | NA | PS | FS | FS |
| Catt 2019             | FS | PS | FS | PS | PS | FS | PS | FS | NA | PS | PS   | PS   | PS | NA   | FS   | PS | PS | FS | PS | PS | FS | NS   | FS   | NS | PS | PS | FS |
| Kim 2019              | FS | FS | FS | PS | FS | FS | PS | NS | NS | PS | NA   | FS   | NA | PS   | NA   | PS | NA | NA | PS | PS | PS | NS   | NA   | NS | PS | FS | FS |
| Wehler 2020           | PS | FS | FS | FS | PS | FS | FS | FS | NS | FS | NA   | FS   | NA | NA   | FS   | FS | FS | NA | NS | NS | FS | NA   | NA   | NS | PS | FS | FS |
| Riveros 2014          | PS | FS | FS | FS | PS | FS | FS | FS | FS | FS | NA   | PS   | NS | FS   | FS   | FS | PS | FS | NS | FS | FS | PS   | FS   | NA | PS | NS | FS |
| Ahmadiani 2016        | PS | PS | FS | PS | PS | FS | PS | PS | NS | PS | FS   | NA   | FS | NA   | FS   | PS | NA | FS | NA | PS | PS | NA   | PS   | NS | PS | NS | FS |
| Yang 2012             | FS | PS | FS | PS | PS | FS | FS | NS | NS | FS | PS   | NA   | PS | NA   | PS   | PS | PS | PS | PS | NS | FS | NA   | PS   | PS | PS | FS | FS |
| Tanaka 2017           | NS | PS | FS | PS | PS | FS | FS | PS | PS | FS | NA   | PS   | FS | NS   | NS   | FS | PS | FS | FS | NS | PS | PS   | PS   | NS | PS | PS | FS |
| Aiello 2019           | FS | FS | FS | FS | PS | FS | FS | FS | PS | FS | NA   | FS   | NS | NA   | NS   | FS | PS | FS | FS | FS | FS | FS   | NA   | FS | NS | PS | FS |
| Hashemi-Meshkini 2016 | FS | FS | PS | PS | PS | FS | PS | FS | PS | PS | PS   | NA   | FS | NS   | PS   | FS | FS | FS | NA | PS | PS | NA   | FS   | NA | FS | FS | FS |
| Merkesdal 2010        | FS | PS   | NA   | PS | NA   | FS   | FS | PS | FS | FS | FS | FS | FS   | NA   | FS | NS | PS | FS |
| Schweikert 2020       | FS | FS | FS | PS | FS | FS | FS | FS | PS | FS | NA   | FS   | FS | FS   | NS   | FS | FS | FS | NS | NS | FS | NA   | FS   | NS | PS | FS | FS |
| Kostic 2014           | FS | FS | FS | NS | PS | FS | PS | PS | PS | PS | PS   | NA   | NS | NS   | PS   | NS | PS | PS | NA | PS | FS | NS   | FS   | NS | NS | PS | NS |
| Jansen 2017           | FS | FS | FS | PS | FS | FS | FS | FS | FS | FS | PS   | NA   | FS | NA   | FS   | FS | PS | PS | FS | FS | FS | NA   | FS   | FS | PS | FS | NS |
| Jingyang 2017         | FS | PS | FS | PS | PS   | NA   | FS | FS   | NA   | NS | PS | FS | NA | FS | FS | FS   | FS   | FS | FS | FS | FS |
| Graham 2016           | FS | FS | FS | PS | FS | FS | FS | FS | FS | FS | PS   | NA   | PS | NA   | PS   | FS | PS | FS | FS | FS | FS | FS   | NA   | FS | PS | PS | FS |

**Key:** FS, full satisfied; NA, not available; NS, not satisfied; PS, partially satisfied.

**Notes:** Cheers checklist Questions:

1. Title
2. Abstract
3. Background and objectives
4. Target population and subgroups
5. Setting and location

| Question No.                                                                                                                                                                                                                                                                                                                                                                                                                                                                                                                                                                                                                                                                                                                                                                                                                                                                                                                                                                                                                                                       | 1 | 2 | 3 | 4 | 5 | 6 | 7 | 8 | 9 | 10 | 11 a | 11 b | 12 | 13 a | 13 b | 14 | 15 | 16 | 17 | 18 | 19 | 20 a | 20 b | 21 | 22 | 23 | 24 |  |
|--------------------------------------------------------------------------------------------------------------------------------------------------------------------------------------------------------------------------------------------------------------------------------------------------------------------------------------------------------------------------------------------------------------------------------------------------------------------------------------------------------------------------------------------------------------------------------------------------------------------------------------------------------------------------------------------------------------------------------------------------------------------------------------------------------------------------------------------------------------------------------------------------------------------------------------------------------------------------------------------------------------------------------------------------------------------|---|---|---|---|---|---|---|---|---|----|------|------|----|------|------|----|----|----|----|----|----|------|------|----|----|----|----|--|
| Study Detail                                                                                                                                                                                                                                                                                                                                                                                                                                                                                                                                                                                                                                                                                                                                                                                                                                                                                                                                                                                                                                                       |   |   |   |   |   |   |   |   |   |    |      |      |    |      |      |    |    |    |    |    |    |      |      |    |    |    |    |  |
| <p>6. Study perspective</p> <p>7. Comparators</p> <p>8. Time horizon</p> <p>9. Discount rate</p> <p>10. Choice of health outcomes</p> <p>11a. Measurement of effectiveness: Single study-based estimates</p> <p>11b. Measurement of effectiveness: Synthesis-based estimates</p> <p>12. Measurement and valuation of preference-based outcomes</p> <p>13a. Estimating resources and costs: Single study-based economic evaluation</p> <p>13b. Estimating resources and costs: Model-based economic evaluation</p> <p>14. Currency, price date, and conversion</p> <p>15. Choice of model</p> <p>16. Assumptions</p> <p>17. Analytic methods</p> <p>18. Study parameters</p> <p>19. Incremental costs and outcomes</p> <p>20a. Characterising uncertainty: Single study-based economic evaluation</p> <p>20b. Characterising uncertainty: Model-based economic evaluation</p> <p>21. Characterising heterogeneity</p> <p>22. Study findings, limitations, generalizability, and current knowledge</p> <p>23. Source of funding</p> <p>24. Conflicts of interest</p> |   |   |   |   |   |   |   |   |   |    |      |      |    |      |      |    |    |    |    |    |    |      |      |    |    |    |    |  |
